# Supplementary material
Source: publisher figshare collection journal article supplement (https://acs.figshare.com/ndownloader/files/6979565)
Supplement: Supplementary file 2 [file 6979565]

Archive with 9 entries (9 files):
- Table S6.xlsx
- Table S7.xlsx
- Figure S1.tif
- Supporting Information_10-11-2016.pdf
- Table S1.xlsx
- Table S2.xlsx
- Table S3.xlsx
- Table S4.xlsx
- Table S5.xlsx
