# Supplementary material
Source: publisher figshare collection journal article supplement (https://acs.figshare.com/ndownloader/files/6979565)
Supplement: Supplementary file 2 [file 6979565 › Table S1.xlsx]

## Sheet: Sheet1
DMGs									DEGs									DE-miRs
T3			T5			T8			T3			T5			T8			T3			T5			T8
Entrez Gene ID	log2 FC		Entrez Gene ID	log2 FC		Entrez Gene ID	log2 FC		Entrez Gene ID	log2 FC		Entrez Gene ID	log2 FC		Entrez Gene ID	log2 FC		microRNA ID	FC		microRNA ID	FC		microRNA ID	FC
30	-1.08752		185	-1.70122		140	-2.21713		3397	-4.41244		2	-0.958539		6286	4.62488		hsa-let-7e-5p	-3.241		hsa-let-7e-5p	-4.303		hsa-let-7e-5p	-4.201
55	0.81831		379	-1.67681		577	-1.37955		3399	-3.63009		16	0.759232		7846	-3.99054		hsa-miR-30a-3p	-2.896		hsa-miR-629-3p	-3.561		hsa-miR-629-3p	-3.59
116	-0.985986		845	2.09025		627	2.69329		9056	-3.09037		18	-0.840476		10457	-4.00849		hsa-miR-95	-2.755		hsa-miR-95	-3.203		hsa-miR-3937	-3.289
150	-1.87474		1788	-4.09506		753	2.84934		112399	-2.55836		51	-0.587756		6447	4.15433		hsa-miR-4291	-2.568		hsa-miR-1226-5p	-3.03		hsa-miR-30a-3p	-3.27
221	-0.547604		4544	-1.62114		920	1.72189		4883	-3.40739		54	-0.649559		4883	-2.7512		hsa-miR-424-5p	-2.452		hsa-miR-30a-3p	-2.996		hsa-miR-1226-5p	-3.035
262	1.77027		6953	-0.356113		989	-2.73813		10537	-2.42111		58	-0.769767		1551	-3.61652		hsa-miR-324-5p	-2.396		hsa-miR-3937	-2.978		hsa-miR-513a-5p	-2.401
280	1.95291		7316	3.14237		1080	-1.36013		3880	-3.63235		59	-0.890129		1811	-4.14769		hsa-miR-18a-5p	-2.281		hsa-miR-4655-3p	-2.609		hsa-miR-4465	-1.702
390	0.474641		9389	3.69998		1144	-3.11527		387882	-2.00868		133	-1.06158		1401	-4.16351		hsa-miR-221-3p	-2.14		hsa-miR-125a-5p	-2.491		hsa-miR-324-5p	-1.609
438	-2.29305		9789	2.50533		1837	1.99432		9332	-2.15459		173	-2.62157		1116	-3.6833		hsa-miR-30e-3p	-1.773		hsa-miR-1249	-2.388		hsa-miR-4257	-1.567
596	1.7319		23030	1.03747		1953	1.15675		7345	2.12704		183	-0.808195		6372	-3.20703		hsa-miR-96-5p	-1.743		hsa-miR-3659	-2.258		hsa-miR-4433-5p	1.761
610	-0.52923		23251	2.51738		2011	-1.72419		51473	-2.12791		202	0.809102		5101	-3.3458		hsa-miR-19a-3p	-1.652		hsa-miR-4465	-2.067		hsa-miR-5787	1.778
618	-1.96966		23334	-2.29457		2180	-1.80805		6372	-3.29485		216	-0.613801		3397	-3.91681		hsa-miR-27a-3p	-1.636		hsa-miR-4656	-2.029		hsa-miR-3651	1.893
660	1.96091		57730	-1.28394		2628	-1.02007		10457	-2.5281		217	0.751149		5197	-2.83137		hsa-miR-5787	1.627		hsa-miR-1185-2-3p	-1.859		hsa-miR-630	2.23
667	1.46662		79674	3.4812		2778	-1.38425		5101	-2.97093		219	-1.06696		7045	-2.00028		hsa-miR-5703	1.792		hsa-miR-1181	-1.811		hsa-miR-130b-3p	2.292
686	-0.498707		79844	6.00493		2960	-1.68939		231	-3.28823		229	-1.2845		4885	-2.68194		hsa-miR-630	1.799		hsa-miR-4734	-1.662		hsa-miR-5703	2.294
701	2.37833		81888	-2.29457		3096	-1.64456		2326	-3.4806		231	-3.27813		27074	4.36549		hsa-miR-4481	2.109		hsa-miR-4462	-1.618		hsa-miR-6129	2.321
774	-2.07837		84622	1.37389		3761	-1.85431		143686	-2.22783		273	-0.616354		143686	-2.58064		hsa-miR-6722-3p	2.375		hsa-miR-30e-3p	-1.582		hsa-miR-186-5p	2.322
813	1.55362		127943	2.03698		3799	0.906113		54873	-2.10871		280	-0.82053		2326	-3.63928		hsa-miR-520b	2.42		hsa-miR-6722-3p	1.595		hsa-miR-520e	2.719
819	-1.58059		222255	-2.11479		3992	-2.98242		199920	-2.23796		283	0.931641		1290	-2.80543		hsa-miR-6129	2.554		hsa-miR-130b-3p	1.627
825	1.74623		374868	1.90358		4046	-2.04521		1290	-2.51944		301	1.69793		112399	-2.12992		hsa-miR-4659a-3p	2.579		hsa-miR-5787	1.789
862	1.39279					4088	1.06925		84913	-2.06427		312	-0.904532		51303	1.85634		hsa-miR-4496	2.971		hsa-miR-378d	1.877
886	2.76124					4321	-0.772009		27286	-1.69541		325	-1.33144		11167	-3.09462		hsa-miR-4534	3.174		hsa-miR-222-3p	2.083
921	-1.31358					4595	3.30706		23767	-1.48607		330	1.38187		8972	-2.29803					hsa-miR-6129	2.164
963	1.62056					4710	-2.49572		90637	1.71975		333	-0.595741		3399	-3.5576					hsa-miR-630	2.313
997	-0.831241					4739	-4.35075		6690	1.78903		335	-1.67007		4925	2.28778					hsa-miR-5703	2.422
1141	2.08036					4856	-0.738353		9022	-1.79545		348	-1.26022		7474	2.11293					hsa-miR-3945	2.456
1237	1.44027					5116	0.997006		51303	1.5812		366	1.63563		387758	2.73461					hsa-miR-186-5p	2.528
1293	2.75249					5218	-1.68739		3398	-1.64539		367	-0.676538		10537	-2.67825					hsa-miR-520e	2.696
1382	-0.730268					5320	-1.34315		22891	1.76707		368	-0.672731		166336	-2.23222					hsa-miR-4778-5p	2.997
1439	2.3019					5590	-1.92333		3490	-3.36586		383	-2.14699		219699	2.80222
1488	2.94923					5646	-3.02001		5947	-1.35789		384	0.989474		9332	-2.50262
1665	1.12444					5774	2.71656		1490	-2.11815		400	1.04235		3606	-1.94841
1740	2.01033					5791	2.13691		4925	1.59317		420	-0.773975		51196	-1.68851
1747	-1.05254					5820	2.13246		7057	-1.47017		440	1.5964		11259	-1.99229
1943	-0.459928					5893	2.17954		10158	-1.86008		462	1.98342		51473	-3.06579
1953	0.856972					5900	-1.69873		10365	1.90015		467	0.767698		2919	-1.9476
1973	-0.396624					6556	1.80732		4885	-2.06863		483	-0.661313		1047	2.09189
2099	1.99907					7075	2.27656		55301	2.00967		546	-0.705046		59084	-2.52209
2189	-1.32909					7432	-1.25572		84417	-1.96797		563	1.54671		3479	-2.12945
2251	-1.47647					8379	0.749447		65108	-1.66767		586	1.05458		53833	1.70107
2296	-0.590603					8569	1.42038		114915	1.3581		590	-1.0521		54541	1.74743
2297	-1.07835					8787	-2.99691		166336	-1.80623		595	-0.757816		231	-3.63591
2313	-0.682171					8850	-1.20455		7846	-3.00482		622	-1.09224		80760	-3.18608
2358	2.41484					8864	-2.19926		51170	-1.11588		635	-0.860894		1410	-2.23952
2595	1.74623					8871	-1.08629		90701	1.5366		645	1.21268		9805	-2.46903
2645	2.97205					8872	-4.01701		84830	-1.59942		650	-1.22532		54463	1.83261
2705	-1.96966					9315	-2.91058		134111	-1.46026		652	-1.19814		9236	1.71115
2735	-0.858097					9639	-2.3666		79739	1.33449		659	-0.682146		51365	1.81117
2842	0.889088					9663	-3.59167		9540	-1.40409		701	-0.693049		80114	-3.56068
2859	-0.908476					9727	-3.03291		10962	1.1536		716	-0.773824		3880	-3.89758
2902	-0.837962					10016	-1.6822		7718	1.80074		718	-1.05721		440	1.75049
2918	2.61016					10154	-2.12291		9245	1.50403		722	-0.769608		387882	-1.88459
2963	2.1046					10351	-0.745915		2673	1.42034		727	-1.08475		55062	1.46903
3010	2.73416					10531	2.86282		1512	-1.29151		729	-1.29498		7873	1.40786
3219	-1.18324					11068	-1.06182		9709	1.13344		731	-1.15733		6696	-3.15009
3269	-0.677525					11070	-1.06182		135932	-1.26579		732	-1.90433		652995	-1.92667
3274	1.30127					11164	-4.01701		83937	-1.19182		746	0.693784		60559	1.79309
3321	2.58831					22841	-3.85953		84869	-1.62819		753	-1.10964		301	2.51613
3326	-1.24418					22976	2.65334		2690	-1.73572		761	-4.31401		90701	1.61404
3340	-0.705307					22982	1.1828		1282	-2.04725		771	0.990681		23046	1.43881
3669	-0.271977					23102	2.22967		57007	-2.39098		780	-0.695368		23767	-1.72026
3671	-1.34485					23263	-1.01218		57530	-1.67352		813	0.634126		7057	-1.72078
3700	-1.53188					23281	3.50685		325	-1.14137		839	-0.64867		6558	-1.65852
3757	-1.53726					23334	-3.04979		23189	-1.40163		847	-0.703572		55728	1.52217
3765	2.15127					23431	2.1074		55062	1.0889		857	-0.69677		54930	1.36531
3786	-0.926545					23471	-1.73968		57817	-4.64441		874	0.824126		6616	-2.62432
3809	1.31714					23633	-3.20751		1601	-1.80751		875	0.708194		3309	1.42478
3938	3.68901					25817	-1.27578		5737	-1.67803		894	-0.944612		116496	3.89431
4046	-0.875461					25893	-2.11236		84513	1.60666		901	-0.89265		761	-4.23102
4142	3.12481					25957	-2.20763		100505483	1.10762		965	0.607219		84513	1.49112
4166	1.86718					26149	0.997483		55740	-1.53344		968	0.614835		10742	-1.35296
4205	-0.127631					27074	1.7323		3570	1.09224		990	1.15865		6659	-1.58421
4286	2.47336					27098	1.95464		6616	-2.22587		1004	-1.52461		9582	1.40492
4615	-1.08752					27132	0.522406		3934	2.26199		1039	0.593647		388403	-1.17169
4625	-1.60665					29798	-1.43291		9365	-1.30602		1040	-0.705393		2673	1.96214
4648	2.02142					50615	-3.0511		1728	-1.2877		1047	1.59906		3934	4.20643
4728	-0.547604					51076	-1.62939		56977	1.39193		1050	-0.696229		6509	1.59846
4762	-0.863597					51272	-3.79357		6747	0.999803		1111	-0.797264		65108	-1.67367
4763	1.60112					54084	-2.86769		84898	-1.88639		1116	-1.9677		199920	-1.97827
4882	-1.09475					54676	2.45926		3099	2.09733		1123	-0.846595		10397	1.74157
4899	0.891084					54680	2.13454		55286	-1.09387		1152	-0.942746		8535	1.49917
4915	0.951465					55081	-0.693211		5243	-1.007		1161	0.856971		55034	1.22643
4974	1.60112					55584	2.32369		8507	-2.42071		1182	0.624028		3490	-4.2356
5212	1.57573					55761	-3.17215		83729	-0.977597		1212	-1.20032		1491	1.66342
5250	2.08754					56666	2.73217		94240	-1.34556		1264	-1.36869		9365	-2.30127
5324	2.05138					56978	-0.941505		23643	1.57589		1266	-0.966688		57560	-1.2131
5339	-0.616538					56995	2.28929		3479	-1.80124		1277	-0.830193		1363	-2.04001
5362	-1.39697					57338	-3.91775		84976	1.03309		1282	-2.58308		1601	-2.30026
5554	1.06466					57491	-1.6822		11167	-2.73416		1284	-1.51139		3398	-1.57329
5588	2.56484					57634	-2.88756		3764	-1.70984		1290	-2.6609		9056	-2.55551
5600	-0.80116					58485	-1.92797		340719	-1.30136		1303	-0.893151		220965	-2.01612
5689	0.913351					60626	-3.79357		3949	1.22385		1361	-1.15427		11340	1.21669
5705	1.97848					64711	-4.99018		2027	-2.55094		1363	-1.89267		9122	1.83011
5747	-0.270002					79501	-1.64047		7804	1.04584		1366	0.777195		57530	-1.69708
5820	2.5434					79656	-1.45207		56911	-2.9762		1368	0.601469		23171	1.54539
5881	-0.978997					80333	-1.88917		152518	1.08998		1397	-1.46239		6446	-2.44041
5911	2.19325					84066	-4.37551		3950	-3.05617		1401	-4.53971		54873	-1.5395
6011	-0.691292					84231	-0.616279		51526	1.00764		1409	-1.7527		6747	1.22978
6036	0.883756					84319	-1.40041		23657	1.69976		1410	-2.12725		64215	1.09621
6326	1.83616					84501	1.92013		7045	-1.64479		1457	0.667093		93099	-1.94313
6362	2.82358					84688	-3.30162		3304	1.59114		1466	-1.16977		54431	1.61001
6405	-0.886303					84871	-1.45207		10742	-1.38562		1474	-1.57081		29925	1.46818
6498	-1.38455					94081	3.63179		54463	1.0606		1475	1.31727		5794	2.23206
6603	1.97848					114789	1.90321		7378	2.1141		1486	0.858893		5673	-2.72864
6604	-0.54196					114905	-1.50604		114907	1.15267		1490	-1.63045		5669	-2.61094
6612	-0.350741					114991	3.25534		25907	-1.32569		1491	1.66148		9429	1.68675
6646	2.60736					116840	-1.92797		8492	-2.20797		1512	-1.35651		3912	-1.69924
6658	-0.888337					133584	-3.33785		6157	-1.56351		1513	-0.753459		55740	-1.17277
6755	-0.365494					155066	-2.60123		8905	-0.971019		1514	0.872595		79083	1.14404
6790	3.35417					255725	1.5835		1004	-1.16851		1515	0.637424		11153	1.85066
6855	-0.588518					257194	-1.07458		2919	-1.53069		1525	-0.620508		55315	-1.19261
6874	-0.557327					283982	1.96946		8842	-1.70584		1543	0.887988		10154	-1.67949
6908	0.913351					285349	-3.81775		4189	1.90462		1551	-3.37573		1475	1.5973
6909	-0.466154					285513	-1.25521		54544	-3.79603		1582	-2.92801		100505985	-1.81071
7007	1.75669					286101	2.60572		11001	-1.40926		1589	-1.10254		1004	-1.69034
7051	-1.10306					286102	2.60572		6275	-1.06565		1601	-2.18508		4318	-1.29653
7054	-0.218144					338773	-1.67539		10384	1.1855		1604	1.65549		1490	-2.1376
7148	-0.903972					387733	-3.79357		6574	1.0941		1610	-0.758429		84707	1.18081
7156	2.30861					391059	-1.52874		7873	1.3526		1616	-0.855572		23705	-1.0588
7161	-1.51943					401089	-3.54498		57507	-1.13234		1627	-1.61739		135932	-1.40323
7169	-0.758695					401431	-2.60123		5478	-1.06348		1649	1.35789		11260	1.16549
7173	-1.42076					431707	-1.46802		285556	1.77012		1650	0.650421		55254	1.07729
7220	1.3528					497258	2.69329		5673	-2.37951		1662	1.39199		126282	-1.26442
7264	-0.854289					553158	1.6314		83875	-1.08107		1666	-0.628221		55532	-1.32156
7325	-0.343026					645323	-1.81658		116496	3.27411		1690	-1.44742		161835	2.89145
7415	-1.32909					653501	1.01976		5670	-1.74581		1728	-0.802991		51123	1.17187
7422	-0.660327					653786	-4.7305		11098	-1.14991		1759	-1.06523		3703	1.04306
7580	1.35259					767561	-4.55463		119548	2.59288		1780	1.44105		9540	-1.02095
7593	-0.42907					767562	-4.55463		140809	1.03565		1787	0.828746		5873	1.26436
7975	-0.832801					100033416	2.17985		92292	-2.69545		1789	-0.86447		10891	-1.38123
8076	2.28148					100033417	2.17985		11259	-1.89388		1803	-0.753837		1604	1.84258
8099	-0.280008					100033419	2.17985		1401	-2.51296		1824	-0.807167		7504	1.50983
8174	-0.452614								2674	-1.331		1831	0.736518		1282	-3.05517
8227	-2.29305								NA	-1.54479		1842	0.720108		2923	1.31122
8314	2.0971								220930	1.63473		1846	-0.59918		79442	1.15051
8448	-0.803235								252995	-1.15365		1847	1.30881		4189	1.97357
8537	5.64937								5445	-0.906599		1903	-1.10989		91050	1.12368
8623	-0.759867								22998	-0.869785		1917	-1.05187		10237	1.02519
8642	-0.841914								1690	-1.39674		1952	-0.666446		253039	1.25298
8651	-0.196757								152007	-1.99713		1953	-0.607782		9871	1.89262
8663	3.30598								5217	1.01713		1962	-0.819551		84913	-1.94653
8681	0.711006								563	0.940688		1978	1.20833		9200	-1.88012
8682	-1.13216								1903	-0.981557		1983	0.626183		23189	-1.12577
8694	-1.68338								5919	-1.47732		2014	0.914163		80709	1.63293
8703	-0.801877								114769	-0.860145		2027	-2.76543		284422	-1.72519
8784	-0.270354								54431	1.16376		2034	-0.627748		6819	-1.1792
8817	-1.39514								6286	2.55695		2035	0.673545		7026	-1.11041
8843	1.86808								91624	-2.19421		2040	-0.70417		84319	1.04538
8908	-0.340164								27074	2.52788		2051	-0.600997		2027	-1.998
8940	2.54739								732	-1.68925		2058	0.636028		79174	1.17674
8976	2.60391								51155	-1.16362		2064	-0.732691		3706	1.86091
8985	-1.63374								11153	1.67184		2065	-0.819987		29108	-1.27339
9040	-0.42907								157869	-1.50877		2091	0.595581		1690	-1.88116
9091	-0.452897								79083	1.06201		2113	0.664115		1466	-1.2282
9123	-0.453579								6505	-1.00392		2119	1.32228		6748	1.06253
9221	1.89172								23316	-1.29796		2131	-0.724078		84171	-1.14959
9223	-0.251688								56261	0.945418		2149	-1.54543		374659	0.985076
9254	-0.720255								10237	0.977197		2158	-1.38956		4692	-1.34487
9271	-0.668465								83597	1.3397		2159	-0.718699		6746	0.945927
9362	-0.913844								10202	0.950467		2161	-0.644522		5730	-1.67913
9401	-1.04127								5197	-2.30281		2165	-1.00456		57178	-1.30278
9502	1.70814								58477	0.906918		2170	-0.756891		5243	-1.04109
9554	1.69002								10525	1.11469		2184	-0.593213		113730	1.18235
9569	-0.475248								60559	1.47823		2217	-0.623896		57761	1.13694
9611	3.00347								3703	0.995941		2232	-0.984161		84706	1.35176
9627	-0.450405								10643	-2.2457		2243	-2.37074		3017	-1.05837
9651	-0.61361								5202	0.950509		2244	-1.88966		56944	-2.24166
9677	4.05716								63933	0.968501		2247	0.902113		3099	2.45278
9739	2.28818								64127	1.3322		2259	0.795785		4162	-1.53492
9771	1.38776								7077	-2.05079		2261	-0.978179		84709	-1.31945
9786	1.00931								55532	-1.17423		2263	-1.04696		113246	1.03124
9895	1.87698								203228	1.4898		2266	-1.31839		116372	-1.67971
9901	1.63745								9871	1.36994		2267	-1.03253		23657	2.44773
9902	-0.32046								10534	0.814112		2274	0.954686		157574	1.23828
9927	1.27776								2244	-1.55575		2281	-0.840588		6275	-1.13898
10166	1.86352								55829	0.84469		2286	0.761373		56605	1.3969
10179	2.27317								27329	-1.20901		2287	-0.625149		3669	1.31421
10213	0.908282								84709	-1.44433		2326	-3.98288		10205	-1.43093
10225	1.41746								79962	-1.04153		2329	-0.604158		1842	1.59387
10242	-1.19636								5156	-1.88801		2335	-0.624506		27077	1.13034
10291	1.88066								761	-4.15534		2346	-1.45758		9601	1.21027
10424	-1.24423								283209	-1.01657		2348	-1.14605		22902	1.16677
10481	-1.46417								84803	1.39972		2353	0.945429		5678	-2.51061
10658	3.10386								56944	-1.67445		2395	0.625081		245972	1.65218
10723	-1.56082								51009	0.812078		2494	-0.668364		55301	2.94704
10739	-0.452371								10051	-1.00345		2537	-0.614953		51088	-0.99059
10743	-1.59983								4982	-1.17602		2564	-0.828754		58477	0.966635
10748	2.26121								8835	-1.39405		2571	-1.13404		4927	0.961065
10781	1.50454								9429	1.28145		2589	-0.762586		483	-1.20988
10801	-1.04673								5678	-1.42772		2617	0.730003		727936	-1.41967
10916	-0.796623								55796	-1.0867		2628	-0.596272		5737	-1.56876
10947	2.00744								6696	-2.85875		2631	-0.657459		10110	0.958181
10969	1.89648								645	1.29853		2638	-0.968335		133	-1.26179
11016	1.28281								94086	1.01789		2669	0.961777		4092	-1.82453
11054	-0.29548								84707	1.24155		2673	1.83821		112464	1.13939
11190	-1.21776								652	-1.03192		2674	-1.25071		57817	-4.17983
11272	1.06466								55857	0.973346		2677	-0.60879		10525	1.08452
11320	0.993493								55254	0.936971		2690	-1.82764		27230	1.19637
11346	-0.930762								25797	-1.27203		2730	0.61871		113763	-1.4767
22821	-1.79709								284422	-1.50758		2731	-1.21794		4982	-1.50944
23015	1.39369								55049	0.885662		2744	-0.606096		4837	-1.41726
23034	2.0116								80114	-2.93647		2762	0.593417		5563	-0.964262
23080	1.46074								10614	-0.933534		2872	0.885		90637	1.109
23082	1.89172								25805	-0.883601		2877	-0.986248		6782	2.09772
23102	1.3905								3945	-0.97993		2888	-0.722337		23184	0.904815
23173	0.914746								2948	-1.02869		2919	-1.2922		51155	-1.09155
23194	-0.355022								23596	-0.818375		2921	0.716669		54585	1.65018
23207	-0.407777								348235	-0.781755		2923	1.21941		9500	-0.996826
23220	-0.357383								1363	-1.8564		2934	-0.612919		23753	1.03908
23221	2.50967								1284	-1.40876		2947	-0.664529		325	-1.15348
23253	1.14401								7043	-1.28616		2948	-1.24569		366	1.79291
23255	2.38111								50854	0.904633		2980	-0.909596		55286	-1.03791
23498	-0.78214								388403	-1.28505		2995	-0.689756		3091	-1.17887
23562	1.48375								115286	0.76587		3012	-1.06025		563	1.57609
23705	2.20366								28984	1.05031		3017	-0.636806		54509	1.18141
23774	-2.98882								29100	0.823409		3026	-1.85063		55857	1.14746
24148	-1.3068								148156	1.04565		3034	0.809664		84417	-1.99822
25972	-0.122873								83539	-1.1575		3075	-1.81087		90411	1.00178
26003	-0.178666								10602	-1.14884		3080	-1.44847		25984	-2.40541
26012	-1.04908								6731	0.817236		3081	-0.657023		6157	-1.70131
26050	-1.30379								85365	0.890365		3087	-0.672882		83597	1.67416
26061	-0.498707								9924	0.999375		3091	-0.729367		51752	1.1375
26086	-0.742762								11119	0.806286		3099	2.72447		9837	-1.24727
26102	-0.742762								115817	-0.962601		3108	-1.11443		138639	1.32871
26121	-1.01768								10397	1.15495		3122	-0.995612		54455	0.98828
26137	1.72447								58515	0.868492		3148	0.951505		6505	-1.07351
26149	1.87973								100288911	-1.33872		3149	-0.666812		10614	-1.00439
26230	1.94704								285016	-2.66375		3175	-0.716351		4501	1.25594
26251	1.09506								1475	1.00048		3240	-2.12834		11074	1.32613
26520	1.00931								1410	-1.7458		3242	-0.871931		2246	-1.08601
27077	-0.598487								285489	-1.36749		3250	-1.67351		79094	1.47936
27231	-0.65699								116372	-0.783028		3251	0.656579		79576	1.134
28956	-0.61004								23171	1.07843		3280	-0.696371		6675	0.898527
29057	2.22835								5362	1.0476		3294	-1.10361		253827	-1.26005
29094	1.00442								80781	-0.89228		3300	-0.688776		23643	1.1964
29767	-1.03716								3694	-1.45095		3304	0.611123		259236	1.03507
29970	1.74247								10581	-0.975588		3306	-1.09999		7077	-2.23403
50717	-1.13216								3400	-1.66936		3309	1.46175		9570	0.900756
51014	-2.52663								100507421	-1.05097		3313	0.87215		1978	1.29019
51085	-0.448714								22902	0.867785		3376	1.05766		2589	-0.862235
51151	2.26567								120227	0.878782		3397	-4.20856		84976	1.11092
51182	-0.616862								100287177	1.12629		3398	-1.56458		92292	-2.05843
51207	-1.84712								6297	-0.889932		3399	-3.5919		29926	1.32202
51279	2.80462								6624	-1.76898		3400	-1.73542		8507	-2.31092
51308	-2.95748								11332	-1.09434		3417	0.686692		6344	-1.99511
51351	1.58642								1397	-1.77503		3418	-1.08774		643911	1.47557
51450	-0.633652								91050	1.11906		3426	-1.21971		93953	1.49889
51455	1.4996								23287	1.27413		3428	0.628894		5106	1.19548
54207	-0.233534								201164	0.744561		3430	0.85092		93082	-1.28771
54441	2.06129								7026	-0.825755		3475	0.618394		55204	1.10722
54494	2.27317								51232	-1.62738		3479	-1.93898		6252	-1.43246
54757	-0.401651								3669	1.74303		3484	0.897388		219	-1.35418
54760	-1.38219								27230	1.00965		3490	-4.19224		51409	0.871134
54796	2.3188								8434	-1.33574		3554	-0.641635		81624	-1.77178
54800	4.97095								126282	-1.24284		3574	0.935182		84288	1.12002
54946	1.81488								4801	-1.3682		3576	-1.01714		54981	1.02001
54957	2.07257								8099	-0.773142		3590	-0.645529		55080	1.18434
54973	-1.23885								10263	0.863683		3600	0.937731		94234	1.93887
55013	1.65503								5252	0.893474		3604	1.0833		2034	-0.891811
55117	-1.45953								57761	1.16343		3606	-2.21062		26227	0.995212
55125	1.85405								3306	-1.49687		3613	0.858286		388743	1.88344
55160	-0.414515								420	-1.09004		3653	-0.711583		10437	-1.02787
55209	0.822226								80223	-0.799104		3655	0.618825		7289	1.02209
55237	-0.476284								5719	0.891261		3669	1.55406		6185	0.879205
55289	2.05647								1582	-2.81621		3679	-1.0132		2040	-0.849741
55329	1.35342								100505783	1.15013		3698	-1.27329		148867	0.93269
55559	-1.3939								3309	1.45383		3700	-0.782834		5244	1.28345
55630	-0.411682								80018	0.76379		3703	1.06373		84869	-1.20604
55643	-0.35155								147727	0.970178		3706	0.851802		113791	-0.903764
55679	-0.7169								51365	1.34655		3717	1.13374		57507	-1.05099
55879	-0.774997								54585	1.38569		3728	-0.599872		6999	-1.106
55975	-0.583301								8534	0.858377		3730	-0.896528		51066	-1.57239
56257	3.17993								950	-0.83799		3764	-1.47269		5699	1.06171
56265	-0.603267								2149	-1.42281		3775	0.66207		51560	-0.967143
56270	-0.456728								168451	0.949588		3797	-1.03419		139221	-1.50939
56893	-0.61004								81624	-1.54606		3800	-0.766701		2167	-2.8816
56894	-0.555019								84263	-0.879851		3827	-1.57955		57099	0.899382
56924	-0.9033								55768	0.738698		3855	-1.98993		1230	-0.907109
56996	-2.64052								4092	-1.83428		3880	-3.45499		28984	1.3606
57144	-1.48296								23705	-1.13628		3911	-0.709581		6867	1.02662
57147	1.81301								753	-0.984333		3912	-0.742969		84236	0.880872
57210	-0.520868								6748	0.849261		3913	-0.8681		120376	1.28423
57405	2.01165								4837	-1.47928		3915	-0.607384		4354	1.33339
57449	-3.13782								57560	-0.918863		3929	-0.925741		7866	0.974268
57537	-0.494986								65062	-0.81698		3931	-0.656083		3294	-1.16078
57579	2.0477								6782	1.50961		3934	3.46006		80008	-1.67871
57623	1.62374								59	-1.03747		3945	-0.719326		84803	1.31069
57804	-0.497078								93953	1.0732		3949	0.988545		9709	1.05615
58499	1.48383								1474	-2.01804		3950	-3.60062		2348	-0.852668
58516	1.32648								51013	0.715666		3958	0.654807		10158	-1.77012
58986	-1.44946								9805	-1.07499		3976	-0.874781		79048	0.786685
59336	-1.69583								1466	-1.01555		3983	-0.955097		5209	-1.5814
60509	1.5094								3606	-1.92049		3998	1.55646		6731	0.985903
63027	2.14092								4330	-1.31236		4053	-0.917447		64343	0.879943
63974	0.941392								8227	0.702096		4065	0.802979		93664	1.4517
64065	0.645784								58	-0.823061		4069	-1.41585		84419	1.95549
64170	-0.907501								163183	-0.792673		4071	-0.7341		56654	-1.0634
64409	-0.731723								18	-0.840066		4072	-1.93097		145788	1.26862
64426	2.985								80008	-1.30171		4084	0.668151		9424	0.99205
64428	-0.743905								1514	0.75278		4090	-0.685087		100288911	-1.81012
64780	-2.42874								55034	0.872501		4091	-0.692685		84105	0.902242
64900	-0.944691								1409	-1.80753		4092	-1.848		154141	1.11358
64922	1.06423								200879	-1.15799		4123	0.709333		1397	-1.36356
65009	-0.610349								8351	-1.38724		4137	-0.611756		7098	1.04585
79026	-0.310179								3604	1.07142		4162	-1.51652		126969	-0.840632
79370	0.777447								154091	-0.921829		4189	2.01397		11046	0.81699
79413	1.41746								10424	-0.966988		4194	0.684432		NA	-1.83559
79707	2.15686								90411	0.954784		4233	0.895022		401491	0.997163
79777	-0.287536								57678	-1.14689		4234	1.09488		100505483	1.10883
79813	-0.88129								1953	-0.791032		4247	0.661722		3484	1.05905
79857	1.32648								9749	-0.742528		4283	-1.22304		2170	-1.17783
80111	-0.740533								64847	-0.971665		4300	-0.736582		1662	1.31163
80114	0.884398								84319	0.884922		4318	-0.877511		3576	-1.60172
80167	1.20567								54741	-0.717725		4330	-1.01822		6906	-2.96017
80169	3.13797								387758	1.50882		4351	0.779031		27329	-1.27399
80173	1.06423								51726	0.750722		4354	0.645983		5768	1.54858
80305	-0.647725								4053	-0.904865		4485	1.47814		2244	-1.72277
80781	-1.36301								27077	0.902387		4495	0.707089		122970	0.857669
81550	-1.08292								55204	0.779381		4499	0.872966		84830	-1.4634
81623	1.72588								6344	-1.21005		4501	0.988673		4072	-2.5323
81855	-2.45965								84288	0.988423		4609	0.750896		387755	1.93104
83443	1.89524								3929	-0.898491		4616	-0.821951		2690	-1.57327
83478	1.34955								10891	-0.902491		4692	-1.27838		100507008	-1.685
83539	-0.418153								834	-0.933985		4703	-1.62724		200373	-0.819115
83698	-0.566649								5627	-1.46181		4706	0.601662		1759	-1.51403
83715	-1.13779								5695	0.68709		4750	0.893053		50486	1.519
83723	-1.74012								1649	1.44579		4752	0.928095		3574	1.1492
84033	-0.327824								399664	-0.914836		4779	0.838609		1903	-1.0934
84107	-0.840459								283383	-1.23539		4801	-0.890053		11234	0.829619
84166	3.14325								79663	1.34119		4833	-0.609124		9695	0.837082
84203	3.70698								9886	-0.957042		4835	0.684529		375056	0.995612
84225	-1.25857								55974	0.863959		4837	-1.47047		8798	0.777443
84254	-1.66603								84171	-1.49571		4879	-2.29585		64127	1.44688
84331	-0.436158								3026	-1.51763		4883	-3.30931		6581	0.981796
84529	1.263								2034	-0.767878		4885	-2.43295		25959	-0.904435
84572	-0.597589								57559	0.873664		4902	0.797499		11231	0.780513
84807	-1.36461								57178	-1.1295		4925	1.83314		55000	-0.779629
84823	-0.208656								5704	0.903193		4927	0.864818		55683	1.0044
84839	-0.889631								2589	-0.704895		4942	0.736129		81493	-1.62738
84947	1.45148								79003	1.10956		4982	-1.27884		79739	1.09598
85352	-0.928992								375056	0.686095		5019	-1.41621		1512	-1.53692
85451	1.62845								7918	0.699717		5050	-0.749759		3122	-1.33771
89846	2.39641								9833	-0.686966		5094	-0.657324		3012	-1.57228
90834	-2.98882								23179	-0.828243		5101	-3.74917		4281	-0.868782
91373	-0.667995								2232	-0.743696		5104	-1.19505		55353	-0.900579
91450	0.61364								6558	-0.859684		5106	0.973997		79875	0.763807
92235	3.90586								55315	-1.18383		5138	1.02581		285489	-1.34227
92840	-1.38219								51196	-1.36676		5140	-0.770386		112817	-1.15971
93185	-0.330105								122525	0.820882		5166	0.961998		51726	0.820739
94081	-2.38096								79174	0.748209		5168	-0.664498		50804	-1.05211
113026	-0.287536								9200	-0.881548		5197	-2.89256		644246	0.771743
113655	-1.04127								134526	-2.03235		5202	0.973404		26049	-1.06562
114822	-1.31844								51339	-1.42049		5209	-1.46789		56977	1.43448
114880	-0.507061								2243	-2.04608		5217	0.776418		148156	0.826439
115701	1.39878								9770	-0.914416		5218	-0.877165		4090	-0.766702
116028	-0.196757								84447	0.731428		5238	1.12487		54941	1.06311
116135	-0.836457								51179	-0.948867		5243	-1.13945		94086	1.02433
116143	1.73233								2731	-1.3744		5244	0.586737		10529	1.15737
116541	-0.889631								10468	-0.791938		5252	0.643152		56911	-2.35486
116985	-1.57336								11118	0.720944		5265	-1.12913		5611	0.995805
117156	1.20687								6659	-1.38287		5274	-0.658499		9465	-1.17903
123876	-0.672268								4194	0.785685		5277	1.01838		91543	0.977369
126375	2.89567								29926	1.05551		5281	0.758222		54898	-0.802336
126789	-1.23885								3911	-0.785871		5314	-0.802263		26022	-0.831226
127077	3.36192								23564	-0.750348		5315	-0.901124		123264	1.43008
127281	-0.822749								60489	-0.886073		5359	0.590552		8777	1.1583
128611	-0.591688								9411	-0.642479		5362	0.931022		51660	1.11457
129303	-0.287583								162989	0.793132		5372	0.613121		NA	-1.24853
129807	-0.662135								3294	-1.41085		5438	0.747792		9597	-1.53151
133383	1.11891								54676	0.787138		5444	-1.29289		51203	-0.979515
136306	1.0347								7429	-0.757823		5445	-0.654583		400	1.00343
138065	-0.925268								145788	0.805713		5446	-0.758035		10384	1.21251
138715	-2.53945								8738	-0.737134		5478	-0.842514		342035	-1.49589
140690	-0.456503								6775	-0.995249		5479	0.660039		5919	-1.39144
140700	-1.3068								7363	-0.683735		5557	1.02032		3950	-3.21607
140730	-0.527288								388182	1.12284		5563	-0.798008		120227	0.811817
140775	2.34604								2119	1.02754		5570	0.712552		348	-2.07672
140856	3.65472								55728	0.945345		5608	0.675284		3797	-0.82302
142680	-1.04908								3376	0.785269		5611	0.874266		51009	0.794363
142891	-1.84712								27248	0.793276		5613	-0.894043		9586	-1.57616
144348	3.67721								650	-1.05603		5624	-1.07111		2947	-0.833298
145781	1.18223								253039	1.08842		5627	-1.28453		55103	1.16829
146325	-0.955768								2281	-0.837213		5629	-0.741946		55227	-1.16255
146336	-0.365494								133	-1.03692		5649	0.927405		7923	1.1395
146664	-0.946136								10100	-2.24722		5654	-0.603286		990	1.44378
146862	-2.14311								145567	0.916894		5669	-1.59162		9173	0.940517
148545	1.63651								23114	-0.872566		5670	-1.19147		7453	1.39694
151300	-2.04744								55084	-0.79805		5672	-1.45291		26504	0.954238
152518	-0.577329								64786	0.857231		5673	-2.56393		25907	-1.68816
157381	1.99814								8600	-0.680981		5678	-1.87001		652	-1.15738
158295	2.3188								6450	0.91734		5694	0.685826		389084	0.916934
158326	2.74928								56937	-2.30027		5695	0.621066		152518	0.922845
165140	-0.78214								11340	1.04036		5699	1.09332		80704	-1.15758
166614	-0.69532								9451	0.644636		5702	0.637175		4070	-1.00999
166968	1.75935								2921	1.10117		5704	0.60498		780	-0.776046
196743	-0.730127								148738	-1.5555		5714	0.652103		56005	1.14546
206358	2.74204								64359	-1.07219		5719	0.589717		3313	0.816845
219931	-0.971945								1266	-0.759283		5737	-1.74186		56648	-1.46531
219972	-1.11357								29927	0.889063		5768	1.51535		5362	0.963645
220441	0.910913								7105	-1.02603		5792	-0.68056		341405	1.29978
220965	1.61535								50486	1.08625		5794	1.58384		84560	0.718196
221336	1.46662								25937	-0.836716		5873	0.971018		54676	0.838642
222962	-0.292875								8440	-0.698353		5886	0.749536		401548	-0.840458
246184	2.62213								10826	-1.01333		5919	-1.74718		55777	-1.64429
252839	-1.05617								80339	-0.832289		5932	0.726591		65055	-1.2915
255057	-0.459928								1627	-1.57545		5947	-1.30886		8099	-0.761859
255877	2.32479								219699	1.50169		5987	0.66599		5238	1.2065
256006	-0.449569								200895	0.649342		5993	-0.773716		83539	-0.970209
256471	1.20567								25959	-0.775492		6001	-1.06641		23630	-1.45484
256586	-1.03716								51458	1.64656		6038	1.52531		201161	0.765208
259290	0.72067								22847	0.738153		6157	-1.34626		23089	-2.12798
259296	0.991444								56950	-0.68934		6185	0.704299		3653	-0.855355
283120	-0.460814								51110	-0.898087		6195	-0.609731		287	1.062
283507	1.86352								57291	0.666198		6196	0.673407		3081	-0.779703
283571	2.86601								23608	0.635284		6249	0.606978		3949	0.729098
283643	-0.727405								2947	-0.764007		6252	-1.45257		2717	-0.747967
283948	-0.452897								9169	-0.785416		6275	-0.853893		6535	-1.53092
284029	3.13797								9837	-0.877495		6286	3.83588		330	0.915398
284656	-1.10938								100506342	0.757006		6297	-0.949808		3764	-1.20774
285622	1.60757								51430	0.65438		6299	-0.727071		149111	1.13484
285753	1.72853								84777	1.45385		6301	0.863593		56521	0.892109
285941	2.25333								283104	0.783855		6307	0.595704		6335	-1.04933
337967	2.32459								641638	0.654757		6335	-1.2694		79161	1.16247
337979	2.32459								4097	0.626792		6344	-1.55588		55829	0.870738
338328	-0.294042								7737	0.694489		6347	-1.26671		80237	-0.987298
338442	2.16678								28960	0.715204		6364	0.871324		91373	-1.91421
340371	-1.59471								5218	-0.796061		6372	-3.27524		27248	1.11156
342035	1.62067								6249	0.669555		6419	-0.674587		158219	0.890007
347733	-0.593045								80263	-1.64294		6446	-1.17779		11098	-0.754111
374618	-0.959242								9448	-0.706281		6447	2.989		4802	0.753884
374897	-1.95969								585	0.697984		6450	1.10501		4779	0.995334
375033	-0.886325								771	0.76335		6472	0.920488		1266	-0.894644
375775	-1.04908								113246	0.892607		6480	-0.793872		9314	1.29146
375790	-1.05557								4072	-1.34613		6484	0.649032		5277	0.987155
386683	-0.350741								26031	-1.25268		6505	-0.954795		79228	0.912018
387778	-0.943604								1497	0.736697		6508	-0.606834		7184	0.829534
389208	0.871986								6718	-1.6491		6509	1.43315		51170	-0.751711
389761	0.773584								441951	0.758322		6514	-1.4267		51232	-1.80257
389816	-0.69719								126917	-1.08945		6519	0.653432		55753	-0.938963
390259	-2.5237								55146	0.714761		6520	0.933799		8936	-0.833656
390980	2.07596								216	-0.767933		6522	-0.638739		65078	0.827785
390999	1.91851								414777	0.623464		6535	-1.11964		11118	0.911094
400120	-1.13709								5993	-0.789316		6541	0.635987		83875	-1.39896
400966	1.04389								28971	-0.8383		6542	1.67775		8409	0.708278
401135	0.871986								23595	0.942862		6554	-1.46769		5649	1.00949
401262	-1.73865								23480	0.634405		6558	-0.945815		10230	0.90953
404672	1.45148								6591	-1.78808		6567	-0.840553		64847	-0.863713
440270	1.39369								6745	0.640218		6574	0.814793		390	-0.99651
440944	0.822226								7088	-0.641513		6576	-0.642667		5478	-0.875003
441549	-0.616862								847	-1.06046		6581	0.764584		4300	-0.952973
442578	2.33449								25825	-0.980366		6590	-0.740396		9197	1.17954
442582	2.33449								2287	-0.634862		6591	-0.821351		8869	-0.725439
493753	-0.122873								3855	-2.52168		6604	-0.887105		11119	0.989942
504189	0.407096								26227	0.863496		6616	-2.78872		57520	-1.21805
550631	1.88066								214	-0.678666		6617	0.995102		122525	0.960058
642968	-1.24765								4752	0.660471		6624	-1.4758		26010	-0.720262
652965	-0.396624								894	-1.29795		6641	0.765317		3976	-1.02631
652966	-0.396624								8100	0.667639		6659	-1.66045		85365	0.693243
653149	1.80069								23157	-0.695796		6675	0.919419		7105	-0.927325
653635	1.71278								3313	0.812386		6690	1.56551		753	-0.796089
653656	1.86872								6419	-0.872119		6696	-2.66725		548645	0.76388
677779	2.09161								219	-1.01807		6709	-0.620626		4750	0.841894
677832	2.08754								91543	1.54976		6718	-2.02641		2119	1.23748
727866	2.22835								1604	1.24445		6723	0.639168		63933	0.832426
728242	1.70814								57834	0.759297		6731	0.985742		252995	-1.08902
728489	-0.907501								79630	0.639499		6745	0.747413		9924	0.949761
728640	0.884398								57619	-0.682509		6746	0.845341		57685	-0.80142
728689	3.30598								200010	-1.37406		6747	1.18288		27286	-1.15017
729085	3.10774								80117	1.65731		6748	0.924731		201266	0.793884
791115	1.77662								9197	1.07269		6764	-0.619211		58515	0.786385
100033413	2.08497								57060	-0.811412		6775	-0.82232		55365	-0.983629
100129066	1.06662								8654	-0.820062		6782	2.02425		54474	-1.18903
100130987	-0.497078								55219	0.614083		6787	0.631872		6514	-1.54169
100131691	-0.42907								55187	-0.797268		6867	0.65347		8351	-2.04055
100240726	1.54733								53918	0.615905		6868	0.72849		1182	0.873223
100302736	-2.52663								100506844	1.17236		6877	0.763953		29927	0.985852
									89978	0.912771		6898	1.3881		54808	0.853488
									11260	0.958139		6906	-3.1685		79956	-0.756113
									5714	0.645505		6999	-1.31243		55840	0.974268
									83939	0.661081		7003	-0.627984		100506342	0.8448
									2677	-0.883254		7025	-0.860162		51523	-0.738415
									9732	-0.842205		7026	-0.896978		79770	0.759554
									9500	-1.00153		7037	-0.815951		84447	0.995494
									9570	0.680393		7043	-1.27815		85480	0.883798
									10678	-0.659113		7045	-1.81556		388335	0.968559
									7466	0.728138		7051	-0.6137		26230	-0.704762
									5987	0.708026		7057	-1.55052		4495	0.975027
									150381	0.686011		7069	-2.10066		55228	-0.835783
									3075	-1.58484		7077	-2.29079		26260	0.784775
									5691	0.611216		7088	-0.650774		119504	0.67316
									80709	0.906586		7097	0.990042		51175	1.27239
									5315	-0.670627		7098	0.741369		22820	0.796057
									5702	0.694315		7105	-1.01631		54931	-0.722632
									26520	0.664419		7164	0.656209		2981	0.991223
									51191	0.722546		7169	-0.647029		55129	0.963438
									84138	0.918521		7184	0.916311		8674	1.11791
									79974	-0.702489		7205	-0.641109		90784	-0.777559
									51720	0.736511		7274	-0.693365		8905	-1.04598
									123606	-0.594132		7289	0.814204		10983	0.802473
									4835	0.713746		7305	-1.34477		3433	-0.995696
									54981	0.899235		7342	-0.627167		10113	0.832923
									5694	0.71018		7345	1.95815		9929	0.779545
									11047	0.714247		7363	-0.688595		26286	0.823378
									252983	-0.598814		7366	-1.66177		51227	0.979158
									1047	1.39125		7378	2.29748		27090	1.08102
									1780	1.66515		7398	0.685093		114915	0.746046
									659	-0.63247		7429	-0.672039		10899	0.716883
									642273	-0.664782		7436	0.734589		2494	-0.909694
									6509	1.08871		7448	-1.28922		3613	1.02008
									221035	-0.644164		7453	1.19671		25937	-0.921429
									9173	0.839401		7466	0.634158		23286	-0.976132
									164832	0.841981		7474	1.80044		2872	1.09864
									9926	-0.783406		7498	1.36075		91624	-2.41413
									51660	0.954471		7504	1.65704		4862	0.71278
									730755	-2.0833		7620	-0.751108		56254	0.718297
									57016	-0.930337		7626	0.678602		7037	-1.06328
									4927	0.650158		7706	0.996331		7088	-0.84577
									400	0.797567		7718	0.739429		1650	0.820801
									51504	0.589754		7737	0.702616		55741	0.992003
									144501	-1.73638		7753	0.616819		6745	0.770706
									4162	-1.34263		7798	-0.597343		54874	-0.711821
									51231	0.692306		7802	-0.682785		5021	-1.74967
									9314	0.866246		7804	1.0269		1803	-1.09686
									171586	0.908713		7841	0.603324		54739	1.00448
									92140	0.698899		7846	-3.77013		23305	-1.59287
									6567	-1.00322		7866	0.851852		9324	-0.778186
									55290	0.739372		7873	1.4703		11332	-0.897573
									5265	-0.81764		7923	0.99705		9789	0.676906
									10717	0.70284		7936	0.938458		51447	-0.751817
									9829	-0.853631		7942	-0.608833		23071	0.763484
									84681	0.700959		8061	0.840428		63924	1.03952
									169270	0.687962		8099	-0.835555		5672	-1.77009
									157285	-0.850157		8227	0.689608		5635	0.654027
									5314	-0.92964		8310	-0.664022		3800	-0.952192
									4129	-0.984489		8351	-1.76812		375449	-0.935821
									1662	1.06907		8409	0.733878		6542	1.59885
									196383	-0.600703		8416	-0.886384		387763	-1.13851
									1491	1.0416		8434	-1.36769		22849	0.937494
									5557	0.846902		8440	-0.678779		2995	-1.129
									154141	0.651414		8455	-0.615723		11285	0.645798
									366	1.67051		8464	0.710027		126868	-1.13187
									127281	-0.835847		8473	0.726294		55974	0.854445
									5717	0.598429		8492	-1.50315		10130	0.7193
									23255	-1.00376		8501	0.646366		23014	-0.688776
									3706	0.592571		8507	-2.08177		55796	-0.829331
									81502	0.829495		8519	-0.922849		81618	-0.688211
									63895	-0.699498		8529	-0.765273		26232	-0.684135
									84910	-1.06529		8534	1.09196		56937	-2.07217
									6514	-1.44987		8535	1.08205		8613	-0.766798
									10912	0.958494		8548	0.65328		11001	-0.70785
									8455	-0.605063		8564	-0.970211		196383	-0.711707
									5690	0.594506		8565	0.708609		4351	0.925741
									4692	-1.00384		8569	-0.609207		6790	-0.664158
									6617	1.30337		8614	2.26479		100132707	0.735738
									9166	0.641659		8615	0.729445		9833	-0.820019
									9582	1.18501		8659	-0.700686		4163	-0.683486
									83758	-1.3477		8669	0.590114		8440	-0.726067
									221120	0.592711		8674	1.04113		9915	-1.27013
									51406	0.618335		8740	-0.697339		201895	0.861615
									8675	0.618711		8777	1.03709		83479	0.804694
									29108	-1.23737		8787	-1.12294		26003	0.654416
									4750	0.925736		8793	-0.759104		9456	-0.842493
									2923	0.813997		8798	0.655883		123920	-0.952038
									26271	0.811223		8809	0.941767		28971	-0.703299
									330	1.03199		8835	-0.92817		3604	1.29473
									7367	-1.75073		8842	-1.50354		83478	-0.847433
									4485	1.57996		8856	0.901066		3108	-1.37141
									29997	0.694793		8858	-0.7591		3376	0.915288
									55968	0.634011		8870	-0.733373		283078	1.47579
									81493	-0.878616		8871	0.829724		23035	-0.65973
									84649	-1.13168		8882	0.639382		9166	0.667997
									5277	1.05625		8905	-1.04844		134526	-1.80969
									1303	-1.07006		8936	-0.774422		6734	0.668454
									127707	-0.647719		8972	-1.42159		9451	0.761211
									100507297	0.76158		9015	1.23755		3026	-1.59774
									2348	-1.27735		9027	-1.08278		284309	-0.725291
									701	-0.732216		9052	0.818756		23588	0.818196
									9586	-1.32445		9056	-3.14764		4879	-2.72882
									23220	-0.93574		9060	0.901213		55219	0.66673
									2744	-0.621547		9069	0.691673		91694	0.673868
									135112	-0.652605		9076	-0.650296		8870	-0.893129
									586	0.733292		9086	0.700576		1407	-0.879474
									131076	0.59998		9122	0.637996		10365	0.813439
									3486	-0.596182		9143	-0.674438		256764	-1.27342
									9086	0.705121		9166	0.731297		9518	1.03956
									7802	-0.88068		9169	-0.654639		8787	-1.39932
									2064	-0.687807		9173	0.682171		63895	-0.693665
									10395	-0.823957		9181	0.706428		83648	0.69744
									7504	1.36421		9197	1.28017		51112	0.907398
									2335	-0.753617		9200	-1.20208		1486	1.05681
									2195	-0.697528		9236	0.997004		518	-0.670244
									54455	0.76634		9245	1.07349		55841	0.793273
									64577	-2.54307		9314	1.19347		6310	0.785599
									10213	0.649127		9324	-0.610259		6450	1.04234
									7051	-0.882222		9332	-2.20474		112950	0.645364
									80763	1.77384		9361	0.713094		26256	-0.96531
									23753	0.880301		9365	-1.40986		1728	-0.797156
									3303	0.807833		9411	-0.58839		22843	1.13006
									25816	-0.965101		9429	1.88944		1212	-1.50027
									79161	0.865362		9448	-0.777747		84847	1.1718
									6746	0.712467		9451	0.615992		1284	-1.45361
									1616	-0.864203		9454	-0.671748		57486	-0.619282
									23589	-0.84598		9455	0.593503		4485	1.56543
									79442	0.76303		9465	-0.844237		162394	1.63298
									83857	0.695727		9469	-0.835021		1534	0.766032
									9095	0.665089		9481	0.591691		217	1.2491
									57600	1.1043		9500	-1.08844		51179	-0.724192
									4864	0.817487		9501	0.604979		4499	1.38161
									55917	-0.780534		9518	1.39618		10972	0.635828
									134359	0.720716		9540	-1.40775		5557	0.73778
									168667	-1.88074		9570	0.821955		53917	0.642161
									6868	0.696939		9582	1.2433		51626	0.842357
									51465	0.669415		9586	-1.44257		8537	1.3009
									255488	-0.66135		9590	0.629807		2730	0.766208
									125144	0.669142		9597	-1.33135		5315	-1.38626
									94239	-0.606777		9601	1.12682		64359	-0.851347
									5669	-1.05274		9650	0.836191		51130	0.929567
									9027	-1.85467		9657	0.774012		1846	-0.954105
									56034	-0.762287		9695	0.8245		384	1.18702
									57103	-0.740423		9702	0.800047		253982	-0.8463
									16	0.709925		9709	1.05697		10060	-1.31104
									54930	0.632987		9770	-0.625718		80336	0.842219
									26128	-0.590696		9771	0.729158		389332	-0.905147
									375757	0.613867		9805	-1.61387		6016	-0.946591
									8829	-0.871825		9829	-0.883476		22822	-0.658599
									10923	-0.675044		9833	-0.612645		10466	0.986047
									51101	-0.711448		9837	-1.06423		5997	-0.827933
									1666	-0.657398		9858	0.655227		55070	0.716149
									5438	0.588117		9871	1.45287		NA	0.705067
									92610	0.751364		9886	-0.687018		83892	-0.685943
									9518	1.01246		9891	-0.773886		22885	1.14732
									51092	-0.608259		9915	-1.29866		23114	-0.783366
									5886	0.70361		9919	0.619984		2920	-1.02386
									4638	-0.681267		9924	1.00257		9404	-0.962201
									23397	0.598182		9926	-0.768851		5646	0.844916
									10456	0.708026		9929	0.829489		1123	-0.90562
									8870	-1.14329		9935	-0.7703		4084	0.743817
									4283	-0.800712		9937	0.631442		10456	0.805285
									780	-0.649643		9950	0.622601		29880	0.64357
									54843	-0.867423		9975	0.59503		1983	0.713106
									1824	-0.815001		10019	0.604422		399664	-0.671322
									8519	-1.09686		10046	-0.719971		645	0.694453
									91694	0.631974		10050	-1.13662		3945	-0.956805
									595	-1.21769		10051	-0.985562		4283	-1.61996
									222643	-0.856275		10060	-1.09058		10202	0.854868
									2872	0.745394		10100	-2.43909		64776	0.837086
									2888	-1.08415		10110	0.940532		57181	-1.07051
									1978	0.756479		10113	0.769786		23480	0.62041
									7805	-0.725411		10129	0.806239		94122	-0.626669
									483	-0.675924		10130	0.718924		79003	0.927963
									8473	0.64118		10135	0.760199		100049716	0.863265
									100128822	0.84127		10154	-1.35665		10049	-0.691728
									100130958	-0.698521		10158	-1.62307		79183	-0.609424
									55959	-0.631846		10160	-0.628023		55187	-0.67808
									29086	0.610503		10170	0.619573		55084	-1.37837
									79686	0.609228		10202	1.04805		120425	-0.917041
									10950	0.805199		10205	-0.812896		284119	-1.01828
									1277	-0.831625		10216	0.786309		3483	0.812664
									149603	0.639931		10230	0.682964		54741	-0.794536
									10082	-0.589854		10231	-0.821054		1627	-1.45557
									NA	0.794167		10237	1.03312		5627	-1.11184
									80184	0.923515		10246	1.10892		6604	-1.10096
									133746	0.769033		10252	0.693925		83667	0.92685
									55227	-0.872701		10263	0.922669		56898	-0.747008
									729970	-0.714		10282	0.800466		85377	1.16872
									5444	-1.71975		10300	0.617557		3990	0.618595
									9597	-1.07741		10301	1.1181		90427	-0.699197
									4779	0.659975		10365	1.28847		2266	-1.26594
									55316	0.663495		10381	-0.623893		29997	0.777228
									26022	-0.643744		10384	1.10479		29100	0.667695
									5479	0.60923		10395	-0.622587		55107	1.02219
									55075	-1.02753		10397	1.3464		6004	0.717309
									8991	-0.848894		10417	-1.14311		3600	1.10696
									200373	-0.792563		10424	-0.71365		4938	0.855422
									7184	0.902426		10426	0.677912		55255	0.777225
									8674	0.836663		10436	0.603885		5519	-0.604037
									80760	-1.27218		10437	-0.815074		254013	0.613622
									29925	1.09344		10446	-0.623438		51566	0.590937
									100506029	0.737663		10456	0.904217		746	0.624953
									7453	0.983576		10457	-3.063		152007	-1.76015
									5794	1.2435		10466	0.866719		23086	-1.00944
									10417	-0.912789		10468	-0.685462		1649	1.22777
									54842	-0.636455		10483	0.704536		54867	0.7267
									23467	-0.834248		10525	0.989505		55830	0.780024
									79071	0.636402		10529	0.950011		84272	0.771405
									197259	0.727264		10534	0.958001		55132	0.639543
									548645	0.63753		10535	0.683018		22943	-2.94609
									5768	0.949717		10537	-2.63062		8534	1.0114
									100506860	0.732247		10581	-0.722811		10797	1.64694
									64376	0.734607		10590	1.3261		129787	0.652551
									114294	-0.589244		10599	-0.674605		5479	0.622879
									26999	-0.914318		10602	-1.01133		55701	-0.679604
									1803	-0.710122		10614	-0.970532		25902	0.769548
									6301	0.750942		10616	0.822006		84056	-0.681408
									5209	-1.22654		10625	0.790482		157753	-1.06761
									27090	0.632217		10643	-1.86154		114793	-0.681562
									5709	0.696005		10668	0.862934		151613	0.647527
									335	-1.05472		10742	-1.62165		8564	-1.14768
									323	-0.593289		10749	-0.746494		81031	0.782943
									9601	0.778808		10765	-0.712561		80896	0.784638
									821	0.627137		10786	0.923002		221120	0.70076
									23401	-0.741946		10797	1.72464		80263	-1.50616
									5792	-0.859798		10809	-0.681644		25805	-0.776974
									51409	0.656915		10826	-1.3975		10007	-0.904147
									56912	0.741721		10827	0.678356		9829	-0.822505
									80237	-0.617159		10864	-1.50295		200879	-1.01594
									384	0.853945		10891	-0.961432		54103	0.855301
									3122	-0.860023		10899	0.643919		259173	0.645761
									112464	0.58849		10912	0.767389		157869	-1.31387
									8728	-0.952386		10950	0.927516		79583	0.831184
									129530	0.767353		10959	0.70703		7802	-0.630547
									23286	-0.75882		10972	0.740169		377677	0.82576
									116151	-0.799065		10974	-0.922523		25897	-0.605345
									84236	0.58765		10983	0.64993		5993	-0.871728
									64757	-0.596299		11001	-1.07214		3998	1.4506
									388115	-1.04243		11015	0.603652		150381	0.856815
									23305	-0.888303		11046	0.662101		9926	-0.798544
									4131	0.743828		11062	0.66188		1514	0.869223
									93664	0.887601		11074	1.00617		4277	-0.665579
									7936	0.692417		11080	-0.717381		284992	-0.846569
									7289	0.669453		11098	-1.03993		9086	0.725853
									4147	-0.80586		11118	0.831427		154467	0.637074
									389792	-0.637653		11119	0.918328		23316	-1.18718
									51130	0.664604		11152	0.666228		8434	-1.33926
									389072	0.769582		11153	1.74523		388722	0.641119
									9858	0.595076		11167	-2.92187		4752	0.754566
									5718	0.604659		11168	0.66122		10026	0.645508
									7866	0.665948		11259	-2.10155		211	0.667158
									9361	0.621988		11260	1.19767		11014	0.617691
									7097	0.799072		11275	0.728075		56943	-0.625873
									114991	-0.744057		11284	0.620367		1111	-0.765213
									2981	-0.668507		11332	-0.821917		1039	0.705941
									9469	-0.812845		11339	-0.776446		11275	1.05837
									10488	0.659542		11340	1.23736		1364	1.0421
									92521	-0.680347		11342	0.6198		5932	0.618699
									221264	0.649393		22800	-0.615175		79912	0.785832
									81606	-2.71961		22820	0.804409		266812	-0.905122
									3673	-0.675967		22837	0.685297		89978	0.736148
									81619	-0.84201		22838	-0.599059		874	0.922765
									368	-0.748199		22843	0.982894		160428	0.997671
									10668	0.818898		22847	0.595186		3956	-0.728634
									59084	-1.29706		22862	0.789454		3624	-0.719609
									58513	0.677852		22885	0.923196		79660	-0.983472
									3576	-1.164		22891	2.23695		10827	0.728974
									11108	0.649995		22902	0.942426		5265	-1.13005
									56648	-0.679481		22941	-0.6484		113201	0.848711
									133688	-1.57445		22943	-1.12603		83931	0.586348
									415116	0.633362		22998	-0.763598		93986	0.725357
									113201	0.622017		23014	-0.661827		8793	-0.800609
									3679	-0.890795		23023	-0.742174		7706	0.794187
									11152	0.661039		23035	-0.677036		8669	0.629093
									558	-0.837349		23046	1.23745		7378	1.55271
									54808	0.841912		23086	-0.890563		546	-0.596312
									79631	0.604986		23089	-1.5801		25827	-0.847953
									23307	0.618003		23112	-0.622893		93550	0.901431
									7366	-1.58369		23114	-0.614697		54806	0.697112
									7025	-0.634282		23125	0.72462		23213	-1.14713
									23764	1.2408		23171	1.53059		51290	0.596417
									5019	-1.05428		23179	-0.698622		83937	-0.866974
									80014	-0.767596		23184	0.744692		80086	-1.16326
									8406	-0.77604		23189	-1.44945		2287	-0.632885
									7037	-0.67174		23213	-0.77093		84681	0.63237
									374659	0.729338		23220	-1.02763		6641	0.85949
									4802	0.595198		23255	-0.902079		79633	-0.850704
									64343	0.765341		23256	0.654097		2744	-0.832795
									7474	1.11839		23286	-0.837105		23075	-0.664812
									22909	0.5889		23287	0.854455		51465	0.932599
									3936	0.749469		23305	-1.24355		9657	0.81932
									56005	0.914566		23316	-1.59445		6690	1.14884
									5873	0.687251		23397	0.75396		79618	0.892083
									10231	-0.929403		23401	-0.851256		9467	-0.594103
									57393	-0.634304		23406	-0.746667		9724	0.652514
									23555	-0.732542		23433	-0.607031		26503	-0.729884
									25840	-1.01643		23467	-0.960641		60493	-0.617821
									9236	0.870464		23480	0.728762		221895	-0.649211
									10567	0.659546		23555	-0.640175		7936	0.763865
									51706	0.68448		23564	-0.761217		441108	0.746771
									84282	0.842721		23588	0.755636		3149	-0.69742
									6472	0.771161		23595	0.71296		51101	-0.696967
									55070	0.704648		23630	-1.19039		7205	-0.945419
									211	0.705323		23639	0.632118		8660	-1.22221
									10616	0.935059		23643	1.70009		5218	-0.767054
									7052	-0.791982		23657	2.57609		27075	1.09408
									49854	0.907838		23705	-1.17035		79876	0.941275
									51454	1.39508		23753	1.14473		4722	-0.628454
									23315	0.849856		23764	1.29888		166929	0.763837
									2065	-0.836158		23767	-1.68571		26223	-0.887112
									9891	-0.793121		23768	-1.16178		51135	0.697501
									55777	-0.946715		25797	-1.33714		9317	0.673923
									1847	0.734118		25805	-0.719709		55093	0.775362
									341405	1.39896		25816	-0.727382		7009	0.638427
									100306951	0.680765		25825	-1.14055		51700	0.590568
									5238	0.806215		25827	-0.659135		59277	1.08821
									5654	-0.628896		25837	-0.741154		3679	-0.837916
									26049	-0.675182		25840	-0.844043		9245	0.66014
									10827	0.617788		25902	0.89097		54997	-1.00776
									NA	0.860111		25907	-1.28941		124976	-0.912528
									128637	0.652452		25915	0.645297		26128	-0.706901
									93550	0.670834		25937	-0.768212		6472	0.930375
									359845	-0.826823		25959	-0.775762		29968	1.04425
									10300	0.639534		26003	0.587453		11339	-1.08697
									100049716	0.802647		26022	-0.823835		10581	-0.785438
									5624	-1.05933		26031	-0.999763		23255	-0.803532
									5638	-0.595215		26049	-0.68179		79139	0.80344
									55035	0.630602		26128	-0.621446		7841	0.766479
									6877	0.78387		26137	-0.71906		11152	0.814757
									27242	-0.714521		26223	-0.625852		80198	0.598944
									92270	0.670996		26227	1.03454		8464	0.612126
									51537	0.697844		26230	-0.648083		57393	-0.728412
									541578	0.61157		26256	-0.601062		5193	0.585427
									147645	-0.774323		26271	0.906832		51569	0.798887
									8882	0.598663		26286	0.632557		2731	-1.1936
									33	-0.816645		26291	0.661861		8614	1.86705
									100507253	1.00188		26354	0.588484		91869	0.647598
									643911	0.641545		26504	1.05654		388115	-1.07488
									8936	-0.62988		26509	0.659027		9510	-1.08651
									54509	1.09552		26520	0.872938		116151	-0.621189
									246330	0.613222		26586	-1.02999		7111	0.641325
									22809	0.799854		26960	-0.730985		375035	0.81125
									6446	-0.854451		26996	0.632534		23595	0.606217
									8740	-0.914262		26999	-0.956561		23155	0.589122
									5106	0.623404		27074	3.67073		6038	1.92467
									7004	-0.599718		27077	1.191		112611	0.868664
									79586	0.799019		27090	1.12467		57017	-0.620225
									23034	-0.601343		27122	-0.603192		126792	0.611479
									51	-0.589314		27230	1.14245		55779	1.08545
									23406	-1.44409		27248	0.988131		2058	0.624105
									8535	0.702756		27284	-0.663493		89797	0.85631
									4052	-0.983417		27286	-1.57837		153830	0.982308
									100507399	0.630838		27293	-0.665116		26515	0.595656
									440836	0.667553		27324	0.663012		100500850	-0.685162
									100128893	-0.737181		27329	-1.34908		348235	-0.804456
									79799	-1.12976		28960	0.662773		140738	-1.06417
									6605	-0.634681		28971	-0.639638		2734	0.746124
									157574	0.864846		28984	1.55965		6297	-1.17781
									718	-1.14836		28992	0.677945		26271	1.06218
									54997	-0.877054		29100	0.745624		6674	-0.632333
									11339	-0.894607		29108	-1.25959		10826	-0.967799
									4071	-1.131		29925	1.45414		23446	0.711133
									51523	-0.69648		29926	1.17011		11041	0.639125
									3430	0.601976		29927	0.885349		126661	0.983571
									8878	0.725652		29965	-0.609647		9919	0.844636
									23768	-0.940054		29968	0.844826		337	0.927157
									22800	-0.61984		29995	0.607273		80279	0.7074
									9821	0.695855		29997	0.805367		54830	1.34509
									285989	-0.591065		30001	0.618978		839	-0.629986
									9454	-0.711203		30833	0.596001		183	-1.15276
									203259	1.01354		30834	0.732684		55890	-0.674302
									266812	-0.773499		30850	-0.708048		10046	-0.967711
									4501	0.648634		49854	0.756852		145567	1.09509
									9465	-0.717442		50486	1.90098		2035	0.72918
									857	-0.851357		50650	-0.834313		100506581	0.651618
									8659	-0.770093		50804	-0.597328		2232	-0.866043
									53917	0.668546		50854	0.595353		7046	-0.615345
									10625	0.630695		51009	0.955827		4053	-0.980755
									6520	1.28373		51013	0.825784		51128	0.662249
									4739	-0.681412		51066	-0.799218		80775	-0.693327
									3953	-0.824859		51083	-0.8665		79818	-0.719227
									123803	-0.63286		51088	-1.10271		55917	-0.875423
									652995	-1.15996		51099	0.912625		966	-0.707283
									4234	0.681562		51101	-0.731721		3006	-0.850142
									2259	0.998763		51110	-0.636937		9454	-0.987301
									6992	0.634639		51112	0.710405		2631	-1.07818
									162394	0.96474		51123	1.20206		90627	-0.999907
									3175	-0.787134		51130	0.592475		23594	-0.654412
									54896	0.731822		51141	0.786223		1847	0.78377
									6335	-1.25802		51155	-0.912876		79269	0.645819
									3081	-0.723435		51170	-1.07889		4137	-0.692444
									6347	-1.42269		51175	1.13541		202	0.687461
									29911	-0.599318		51179	-0.875599		152006	-0.631591
									284119	-0.885487		51191	0.878836		23590	-1.00965
									22843	0.870697		51196	-1.45555		84440	-0.63751
									4673	-0.63933		51200	-1.07087		51099	0.793751
									2934	-0.589804		51203	-0.787963		9143	-0.96955
									NA	0.787437		51227	0.959031		10808	-0.673821
									400916	0.765075		51231	0.603016		5608	0.892736
									10560	0.743094		51232	-1.59473		163183	-0.87583
									1212	-0.873796		51248	0.589927		54953	0.672754
									9069	0.712249		51255	0.597197		27063	-0.768543
									57181	-0.948092		51295	0.596033		9971	-0.850887
									307	-0.723271		51302	1.22653		339230	-0.753045
									51295	0.778302		51303	1.85108		2882	-0.719163
									23590	-0.605224		51339	-1.52469		7804	0.728665
									317671	0.58585		51361	0.762785		9935	-0.715915
									140738	-0.930523		51365	1.7723		81610	-0.828075
									374378	-0.863895		51377	0.677645		27293	-0.749722
									154796	-0.7459		51406	0.604662		3910	-0.935334
									9832	-0.752306		51409	0.804896		734	-0.939903
									100129104	0.776564		51422	0.790999		143888	0.69372
									22862	0.685708		51447	-0.643126		11030	-0.723523
									64750	-0.730757		51454	1.78604		11284	0.612576
									55779	0.975732		51458	1.02315		57007	-1.57213
									7706	0.711902		51465	0.953472		8492	-1.03661
									4547	-0.99423		51473	-2.6002		140809	0.883655
									367	-0.746838		51504	0.634875		8829	-0.929572
									90427	-0.786402		51520	0.626759		54732	0.687575
									79651	-0.673483		51523	-0.769463		481	-0.810397
									26286	0.588087		51526	0.662723		29887	-0.778346
									858	-0.735006		51537	0.689879		203523	0.778191
									58985	-0.590393		51560	-0.810317		283209	-1.02714
									10301	0.67678		51567	0.622311		55601	0.981352
									10749	-0.736041		51626	0.788688		51667	0.688767
									5672	-1.2632		51651	0.643695		64135	0.647673
									113791	-0.672186		51660	1.00547		5981	0.658608
									1942	0.638234		51703	0.871711		65062	-0.787286
									4069	-1.31353		51726	0.764087		85236	-0.59441
									9929	0.66717		51752	0.874536		8473	0.810887
									8856	0.83927		51760	0.590779		80216	0.637763
									7923	0.612865		53833	1.34241		252983	-0.794506
									7626	0.678639		54103	0.741379		127281	-0.711407
									100505634	0.686746		54431	1.48738		9466	-0.651106
									3976	-0.88525		54455	0.699498		10051	-0.988828
									290	-0.72615		54463	1.5403		222642	0.721554
									94122	-0.625001		54509	1.32464		701	-0.774199
									55356	0.675265		54541	1.74122		10468	-0.704342
									100287628	-0.712662		54544	-1.85813		10129	1.05702
									26504	0.693407		54554	0.699794		8910	-0.907416
									118881	0.614654		54578	-1.16891		79142	-0.659052
									79183	-0.758209		54585	1.52214		84282	0.957161
									79679	-0.935384		54676	0.855268		5257	0.601267
									661	0.654809		54716	0.607867		7305	-1.07176
									23125	0.730655		54732	0.613589		10020	0.658086
									84141	-0.726214		54733	-0.71401		4815	-0.666696
									3590	-0.609317		54739	0.811132		6508	-0.779886
									5104	-1.5184		54741	-0.763804		25837	-0.741771
									730102	-1.00864		54757	-0.918707		79663	1.30117
									7448	-1.08123		54762	-1.11784		9749	-0.668955
									3998	1.13539		54806	0.587218		64786	0.665102
									54541	0.815975		54808	0.851189		1891	0.60197
									64855	-0.642793		54825	-0.758967		25941	-0.677445
									4318	-0.89096		54830	0.964667		10634	-0.631801
									152273	-0.616683		54842	-0.665841		3430	0.691435
									7498	1.50937		54867	0.611274		871	-0.641417
									59341	-0.688528		54873	-1.5813		100506029	0.720151
									440434	-0.740582		54874	-0.654103		55915	-0.629413
									23558	0.848909		54898	-0.746544		9854	0.740561
									1525	-0.66536		54899	0.70033		100507421	-1.16393
									9324	-0.660737		54930	1.11861		353322	0.624471
									1390	0.66903		54941	0.757719		5372	0.712767
									203111	-0.667706		54981	0.999954		8505	0.64721
									1370	0.798607		54997	-0.714744		149041	-0.662858
									58499	-0.912711		55000	-0.795492		154091	-0.704671
									5570	0.741499		55033	0.654095		374378	-0.622227
									3240	-0.808732		55034	1.2419		25797	-1.46664
									3418	-1.02393		55049	0.71505		256471	0.634629
									9249	0.598542		55062	1.16817		727	-0.990723
									9657	0.76884		55070	0.805386		9950	0.647733
									54578	-1.46294		55075	-0.62094		9481	0.781499
									7168	-0.771657		55080	0.794459		220323	1.11547
									64093	-0.622804		55084	-1.10665		23462	0.758883
									6999	-1.82089		55093	0.689647		154754	0.608034
									80727	-0.692805		55103	0.985807		100505783	0.85203
									3797	-0.694397		55107	0.646064		9891	-0.818772
									100506965	-0.786493		55129	0.944544		5202	0.674844
									91947	0.630685		55132	0.601219		79884	-0.795277
									389084	0.600478		55146	0.719384		158293	0.603377
									5763	-0.892801		55151	0.670169		7429	-0.846381
									3091	-0.610876		55161	0.685492		55193	0.693983
									4286	-0.780172		55187	-0.827762		23361	-0.674421
									51099	0.632892		55190	-0.862742		126410	-0.945856
									83478	-0.695628		55204	0.827595		401237	-0.650108
									51088	-0.764414		55227	-0.97638		5019	-1.27515
									55840	1.04797		55234	-0.590633		400043	-0.71685
									2170	-0.980707		55254	1.12141		23514	0.613956
									80086	-1.51692		55255	0.691032		59	-0.982261
									10060	-1.07019		55286	-0.884205		56912	0.588721
									26586	-0.64328		55301	2.24113		2261	-0.753364
									643837	0.640415		55314	0.651432		220930	0.805606
									6252	-1.2622		55315	-1.07261		254295	0.658622
									57167	-0.79179		55316	0.651019		3400	-1.40728
									54898	-0.855429		55319	0.603072		153020	-1.04657
									727936	-1.1193		55321	-0.594352		10483	0.645986
									100505854	0.587623		55323	0.646395		5438	0.663948
									79157	0.585608		55326	0.587676		6301	0.741408
									4084	0.605153		55347	0.643521		80758	-0.674349
									283229	-0.760668		55356	0.840467		219854	0.661908
									90627	-0.859826		55364	0.850678		3371	-1.13125
									441024	0.816485		55365	-0.71253		6621	-0.641259
									80216	0.636623		55435	0.858693		55755	-0.767811
									152831	-0.796047		55532	-1.36535		30834	0.700503
									122786	-1.07477		55544	-0.644039		29127	-0.757399
									343099	0.614638		55553	-0.75864		55190	-0.774885
									9075	-0.867573		55601	0.664466		200942	-0.677229
									79583	0.604464		55646	0.594659		80267	0.984313
									8798	0.610894		55683	0.877184		9702	0.756441
									5050	-0.643446		55700	-0.67439		7408	-0.661201
									10351	-0.833959		55701	-0.636715		85007	0.621679
									55683	0.710707		55728	1.23382		8871	0.767677
									56931	0.928886		55740	-1.33716		123803	-0.749022
									116842	-0.802234		55741	0.656277		80763	1.25892
									55568	-0.614548		55753	-0.968624		4233	0.796207
									5998	-0.638974		55768	0.669568		4234	0.62445
									90673	0.796889		55777	-1.29938		56935	-0.590356
									79038	-0.595495		55779	1.17996		85021	0.587761
									56926	0.702152		55790	-0.714883		7582	0.697011
									145389	0.831279		55796	-1.13601		4141	0.682524
									6913	-0.615137		55829	0.924041		51430	0.617168
									25895	0.617185		55830	0.606275		56261	0.666816
									5366	-1.17992		55840	1.16116		5947	-0.723868
									10346	-0.651216		55841	0.724692		6522	-0.862185
									63908	0.587109		55856	0.774814		2635	0.73122
									3417	0.659156		55857	0.923914		10009	-0.833748
									81855	-0.706167		55859	-0.762709		79630	0.606757
									163859	0.612766		55917	-0.738177		23641	-0.650523
									51626	0.687127		55974	0.857799		32	1.17767
									5140	-0.76938		56005	1.14486		57221	0.703726
									6542	1.14993		56261	0.966699		16	0.767393
									2266	-0.956372		56271	1.20106		57446	-0.605124
									54823	0.588778		56521	0.889037		2263	-1.09786
									79018	0.755692		56605	1.18491		9794	-0.602031
									2628	-0.819428		56648	-0.982107		3394	-0.6428
									144577	0.610366		56654	-1.03245		387103	-0.708268
									8548	0.730387		56898	-0.741132		200185	0.627723
									1551	-1.91905		56907	0.700159		83439	-0.676148
									6581	0.633384		56911	-2.9818		730091	0.646432
									4091	-0.779659		56912	0.87259		8727	0.60501
									51123	0.638079		56915	0.818695		9361	0.700144
									7128	0.735009		56926	0.664678		2804	0.67727
									91683	-0.851446		56931	0.877987		7167	-0.716831
									1182	0.622383		56937	-2.22758		51141	0.805336
									4781	-0.587308		56938	0.637342		3240	-2.94026
									9015	1.03173		56944	-2.15637		26608	0.610334
									688	-0.765589		56950	-0.61521		4673	-0.593846
									5130	0.684469		56969	-0.674657		2810	0.93949
									83548	0.65182		56977	1.41435		54205	-0.641203
									1326	-1.59636		56985	0.619625		3075	-1.65705
									8869	-0.613498		56986	0.722495		55323	0.663041
									56943	-0.712961		57007	-1.73604		5207	0.603602
									8777	0.722135		57045	-0.611141		91133	0.604081
									1195	0.601724		57099	0.885957		359845	-0.912325
									10437	-0.743702		57103	-0.674718		83988	-0.803037
									5629	-1.10877		57167	-0.824515		29953	-0.643536
									6447	1.60888		57178	-1.27472		7869	0.634331
									113146	-0.873095		57181	-0.843084		22800	-1.06865
									56605	0.946629		57198	0.65017		10274	-0.637165
									134548	-1.02908		57221	0.742185		3929	-0.894732
									8614	1.04898		57393	-0.668684		126917	-0.639431
									27018	-0.607681		57507	-0.973203		5314	-0.659166
									1264	-1.42261		57520	-0.744841		1164	-0.774655
									1106	0.604441		57530	-1.77653		100507487	-1.09255
									4902	0.826628		57559	1.18025		216	-0.599025
									6502	-0.679741		57560	-1.20598		51053	-0.729364
									224	-0.647369		57600	0.881921		3169	-0.680062
									55700	-0.631867		57678	-0.875014		51361	0.692128
									4879	-1.7354		57684	0.620863		92610	0.883616
									53833	0.718604		57685	-0.920351		6590	-0.725624
									6351	-0.600578		57761	1.5233		2948	-1.32628
									100507487	-1.49715		57817	-4.99627		10381	-0.647649
									2877	-1.22122		57834	0.807601		4616	-1.07861
									2537	-0.668001		58476	-1.17428		4071	-1.03841
									79101	0.660316		58477	0.965729		7466	0.643215
									51093	0.666229		58505	0.92856		2149	-1.34418
									8565	0.650996		58515	0.844323		80781	-0.732153
									11080	-0.819481		58526	-0.642265		23401	-0.827024
									7673	0.7693		59084	-1.98416		58533	-0.608338
									57045	-0.630634		59277	0.828418		8317	-0.7111
									58505	0.616285		59341	-0.643515		128344	-1.11766
									84930	0.623759		60489	-0.735398		726	0.682229
									1102	-0.645122		60559	1.97281		22837	0.639228
									3426	-1.20825		63895	-0.833772		3892	-0.641257
									220323	0.681903		63920	0.75836		5138	0.736569
									100507410	-0.620357		63924	0.746862		414777	0.646493
									9702	0.586665		63933	0.925532		27433	0.700774
									4674	0.979245		64073	0.811702		162417	0.802415
									1123	-0.678012		64081	-1.22405		63826	0.644891
									4599	0.623876		64127	1.47317		10643	-2.28216
									23175	0.680207		64135	0.73476		2243	-2.02675
									27347	-0.712797		64215	0.695254		57161	0.897445
									200942	-0.644167		64284	-0.736725		7798	-0.660476
									253827	-0.681061		64343	0.786417		57167	-0.95972
									83733	-1.62408		64359	-1.1023		55589	-0.614298
									2261	-0.929777		64376	0.756048		10227	-0.63524
									9650	0.606365		64400	0.596678		7078	0.717229
									55129	0.805108		64417	0.731721		6718	-2.03547
									79888	-0.843296		64577	-2.48376		7942	-0.6545
									23089	-0.922556		64762	0.602241		6196	0.713616
									8787	-0.967571		64776	0.816504		440836	0.762185
									1412	0.861345		64786	0.72013		55364	0.836573
									84706	0.706869		64847	-0.976498		7626	0.874097
									100506718	-1.43313		65009	-0.855093		1457	0.629664
									3698	-1.46753		65055	-0.764263		80339	-0.685259
									100506963	0.648036		65062	-0.775377		4194	0.825788
									3485	-0.677243		65108	-1.62206		7097	0.791819
									3983	-0.761431		65243	0.682913		10254	0.628247
									80704	-0.665324		65998	-0.595922		25854	0.667945
									79633	-0.634803		79003	1.01845		528	-0.746644
									7305	-0.798888		79018	0.680107		200010	-1.27269
									51200	-0.915829		79048	0.628527		7292	0.767092
									51083	-0.683868		79071	0.737055		10417	-0.723403
									727	-1.36493		79083	1.2049		10231	-0.693036
									387647	0.594068		79094	1.36396		134111	-1.04241
									670	-0.703052		79139	0.640891		2719	-1.35256
									8061	1.25671		79157	0.591245		23636	-0.597747
									57544	-0.591761		79161	1.06137		307	-0.585086
									2346	-1.69021		79174	0.959712		10962	-0.675302
									116068	0.59828		79183	-0.623586		127700	0.706783
									80896	0.722095		79228	0.823353		30001	0.628399
									3717	0.716894		79269	0.61639		10590	1.35226
									55151	0.657194		79442	0.844358		523	-0.630489
									157753	-0.624822		79574	-0.688169		1831	0.737008
									112817	-0.808546		79576	0.731467		121227	-0.687496
									7072	-0.724342		79583	0.771264		728730	0.58853
									2165	-1.87622		79586	0.81676		51013	0.711303
									149041	-0.591927		79618	0.601104		25816	-0.815403
									51268	-1.03486		79633	-0.845919		3280	-0.829936
									84804	0.653618		79641	-0.737623		79960	-0.695117
									5352	-0.596267		79648	0.654479		1666	-0.665903
									8972	-0.617543		79651	-0.65262		26136	0.612148
									27122	-0.589774		79660	-0.903526		100506844	1.04234
									5500	-0.58947		79663	1.1935		400236	0.601395
									55365	-0.626527		79686	0.684873		10246	1.41774
									126969	-0.75251		79693	0.711677		100131733	1.02696
									7753	0.72183		79738	-0.600132		65998	-0.669275
									6906	-2.51798		79739	1.15893		57198	0.640545
									6307	0.695381		79752	0.756025		25915	0.598564
									2494	-0.668984		79770	0.610155		64400	0.607218
									57569	0.641451		79782	-0.733911		1428	0.617298
									27284	-0.63108		79799	-1.43035		171586	0.686439
									2131	-0.613396		79818	-0.61566		400916	0.633633
									6535	-0.634546		79866	0.66545		55273	1.30088
									3250	-1.26921		79875	0.776114		650	-0.906633
									2159	-0.732739		79876	0.864607		7164	0.613119
									100506314	0.748014		79888	-0.868124		3428	0.771558
									100268168	0.62463		79960	-0.788824		10950	0.746702
									1610	-0.774282		79962	-0.966532		3418	-0.857876
									5611	0.854553		80008	-1.79827		79738	-0.685276
									256764	-0.792438		80018	0.68852		4833	-0.698069
									51227	0.595662		80067	0.829477		6567	-0.757954
									1486	0.650761		80086	-1.16578		80854	0.612796
									64081	-1.61497		80114	-3.11653		3162	-0.619996
									440	0.737057		80117	1.62081		100306951	0.593654
									26287	-0.804136		80127	0.690651		80184	0.839362
									5138	0.849035		80184	0.878945		79140	-0.659915
									51129	-1.19442		80235	-0.613398		7052	-0.638161
									55364	0.69171		80237	-0.76664		26586	-1.30747
									388796	0.608103		80263	-1.40651		79962	-0.824642
									3310	0.735261		80267	0.851836		9032	0.676244
									9909	0.608613		80279	0.60766		10282	0.832608
									6554	-2.28794		80336	0.698614		5423	-0.676335
									10009	-0.598928		80339	-1.02145		875	0.638698
									389336	-0.608884		80704	-0.699907		3983	-0.812595
									5274	-0.895495		80709	1.2366		401152	-0.734517
									50650	-0.623221		80727	-0.640242		2346	-1.27041
									137872	0.80956		80760	-1.82965		2155	0.708078
									443	-0.614511		80763	1.92025		5834	0.848621
									1643	-0.63046		80781	-0.81712		8728	-0.694655
									11062	0.633419		80896	0.890974		54622	-0.647044
									NA	0.627544		81031	0.615933		2852	0.665296
									120	-0.629639		81493	-1.10307		8842	-1.37047
									130827	0.649385		81494	-1.49571		23315	0.632144
									11223	0.930519		81502	0.737904		2131	-0.757648
									590	-1.19394		81606	-2.21528		10616	0.802964
									23371	-0.659431		81610	-0.5876		9060	1.10953
									2707	-0.610516		81618	-0.718197		190	0.699242
									722	-0.872236		81619	-0.719443		100287177	0.983443
									100131733	0.707018		81624	-1.85873		81619	-0.720593
									3912	-0.619155		81706	0.609343		220074	0.631951
									27044	0.600882		81788	-1.08207		1318	-0.647878
									173	-3.15412		81855	-0.786302		51302	1.72329
									2328	-0.767719		83439	-0.715944		5763	-0.821888
									5045	-0.601297		83448	0.820749		84864	0.595076
									5037	-0.645084		83478	-0.705509		2674	-0.758627
									6001	-0.925921		83479	0.668386		2877	-1.07226
									9510	-0.61811		83539	-1.12802		642946	0.670354
									2646	0.616888		83548	0.741688		9076	-0.791238
									8416	-0.958713		83597	1.72025		2617	0.61522
									NA	-0.671818		83643	-0.62134		90673	0.813876
									2184	-0.756772		83648	0.726223		643837	0.59316
									388335	0.622252		83667	0.861631		1525	-0.665032
									1161	0.61306		83729	-0.832412		1824	-0.775456
									90293	-0.74648		83733	-1.50815		23194	-0.690842
									10809	-0.595736		83758	-0.930608		11031	-0.666404
									94234	0.914142		83862	0.639693		9075	-1.04651
									NA	-0.649229		83875	-1.61817		4123	0.77408
									4947	-0.598614		83931	0.600586		54716	1.04632
									7263	-0.801451		83937	-1.20028		147968	0.962187
									92249	0.710127		83939	0.62255		3242	-1.04393
									23460	-1.23253		83988	-0.786558		1513	-0.630261
									874	0.734242		84056	-0.598799		6928	-0.594913
									1543	0.938808		84105	0.757647		729852	0.683056
									10864	-1.43465		84138	0.925354		6419	-0.706603
									1559	-0.833639		84141	-0.863376		6387	-0.642114
									85377	0.671131		84171	-1.52809		84879	0.781861
									684	-0.635735		84236	0.808091		5288	1.22032
									79660	-0.797973		84263	-0.62415		51014	0.649956
									3600	0.594688		84269	0.74665		80067	0.638302
									9937	0.585434		84282	0.959428		9371	0.62846
									29948	0.677995		84288	0.997632		64577	-1.84173
									3176	-0.622233		84319	1.03196		65109	-0.622445
									3123	-0.654711		84417	-1.66188		10602	-0.783617
									3108	-0.848304		84419	1.36536		168451	0.618226
									4300	-0.757181		84447	0.839206		57103	-0.693462
									27141	-0.632978		84513	1.72415		118881	0.670879
									56271	0.836751		84649	-1.02599		23376	0.706153
									183	-0.730696		84675	0.637567		10765	-0.746346
									8382	0.818863		84681	0.597483		23256	0.788685
									115701	-0.632615		84706	1.127		115908	1.20625
									81788	-1.10438		84707	1.10737		3730	-1.12368
									51175	0.695303		84709	-0.979754		118788	-0.592291
									229	-1.30944		84752	-0.719149		1028	-0.762403
									54825	-0.652682		84777	1.68247		22926	0.586055
									100499177	0.641562		84803	1.56176		83643	-0.671999
									120376	0.789013		84804	0.872729		649446	0.671376
									79960	-0.68525		84830	-1.19589		280	-0.780008
									51141	0.601991		84847	1.28751		1520	0.673888
									123920	-0.687508		84864	0.636053		1595	0.71662
									3242	-0.702091		84869	-1.24501		586	0.934382
									81494	-1.78004		84886	-0.586585		27151	0.779685
									1827	-0.587392		84898	-1.97333		51309	-1.08224
									60314	0.648658		84910	-0.866026		79018	0.609911
									201283	0.64705		84913	-1.74528		100505641	0.686466
									337	-0.612269		84976	0.895677		197259	0.731123
									5446	-0.888954		85007	0.637757		9665	0.595394
									54762	-0.92306		85021	0.6834		5886	0.590432
									3148	0.705933		85365	0.827499		4048	-0.59223
									54622	-0.674417		85377	0.992014		10300	0.660139
									284018	0.590976		85480	0.897878		3475	0.669512
									730101	0.692872		89797	0.623919		54436	0.638488
									2980	-0.766114		89978	1.02576		9743	0.671612
									731	-1.69427		90411	1.10579		4902	0.819213
									1906	-0.810817		90427	-0.888833		27242	-0.67853
									727957	0.655075		90627	-0.871543		55002	0.609256
									30850	-0.591462		90637	1.45822		55356	0.707716
									56898	-0.61606		90673	0.73747		26031	-0.995402
									220965	-1.12806		90701	1.62496		4494	0.679116
									56654	-0.6271		91050	1.11093		6764	-0.774271
									92840	-0.670198		91373	-1.06601		730755	-1.27566
									3726	-0.613124		91543	2.58171		169200	-1.01752
									80267	0.59911		91624	-2.44127		123606	-0.605077
									54988	-0.939929		91683	-0.689961		312	-0.846879
									55753	-0.796358		91694	0.677305		285016	-2.41653
									7798	-0.612977		92292	-2.63179		22838	-0.679168
									83862	0.660973		92521	-0.779208		168667	-1.76796
									9146	0.797179		92610	0.980746		440026	0.813061
									2669	1.08035		92675	0.658771		80823	-0.600834
									3730	-0.928454		93099	-1.35234		6307	0.781291
									93099	-1.02405		93100	-0.619956		10534	0.663478
									63920	0.655883		93550	0.80038		50650	-1.07742
									3087	-0.848092		93664	1.38602		4286	-0.643904
									83667	0.602941		93953	1.25178		6576	-0.649699
									901	-0.812626		94086	1.02184		6299	-0.620887
									1962	-0.860611		94122	-0.624913		2646	0.643355
									64777	0.615986		94234	1.42818		847	-0.636193
									118471	-0.808538		94240	-0.960321		11015	0.730457
									10110	0.769255		112399	-2.57645		285512	0.610305
									6480	-0.98003		112464	0.921509		8736	0.884295
									58476	-0.769203		112611	0.825496		84269	0.621958
									23788	-0.654263		112817	-0.738035		58505	0.767984
									119392	0.775906		112950	0.608896		26960	-0.762965
									1846	-0.623184		113201	0.765059		1717	0.717623
									383	-2.78697		113246	0.944755		9052	1.20641
									126661	0.834137		113763	-0.744223		51191	0.904153
									23645	0.681252		113791	-0.74028		84693	0.702269
									10924	0.678241		114907	0.968462		NA	0.618624
									23046	0.835134		114915	1.17684		7498	1.02148
									57095	0.659846		114991	-0.875658		200634	-0.609256
									2052	-0.669529		115286	0.718977		8416	-0.91388
									306	-0.609004		115701	-0.705298		10	-0.702903
									57685	-0.816511		115817	-0.708016		5359	0.751757
									55859	-0.639877		116151	-0.602626		28959	-0.609336
									55621	0.643695		116372	-1.31414		9145	-0.590633
									5613	-0.673227		116461	0.837125		147645	-0.686091
									132321	-0.662107		116496	3.57774		64417	0.688225
									1361	-1.67695		116842	-0.736617		83992	-0.839552
									7915	-0.586729		116987	0.657118		79071	0.977663
									3080	-1.97425		118471	-0.713569		5050	-0.644409
									9846	0.612862		118881	0.720197		100129104	0.774993
									54	-0.675973		119392	1.07096		79651	-0.629326
									433	-0.786201		119548	2.45134		84541	-0.954136
									1589	-1.04243		120227	0.984747		11163	0.686735
									170626	0.622003		120376	1.35342		132720	0.6672
									55856	0.615222		121227	-0.62504		65009	-1.51456
									284111	-1.56758		122525	0.954583		80727	-0.760787
									79782	-0.905177		122970	0.842753		10668	0.619643
									6519	-0.674087		123803	-0.809341		221786	-0.692743
									28992	0.632094		123872	-0.798424		286262	-0.645584
									10023	-0.765798		124152	0.678373		6992	0.613911
									24147	-0.60385		124976	-0.627196		112942	0.632277
									100132891	-0.702217		125144	0.650846		100506948	-0.683829
									401081	-1.2458		126282	-1.26724		129607	0.595682
									8875	-0.590042		126661	0.847799		619279	-0.630291
									3159	0.663289		126917	-0.905446		8809	0.982186
									10252	0.616835		126969	-0.700981		83862	0.622945
									55435	0.683491		127281	-0.724846		8365	-1.53121
									2638	-0.759057		127700	0.807815		79038	-0.71629
									3248	-0.630847		127707	-0.664094		54503	-0.628689
									2263	-0.795562		128387	0.655883		164832	0.833388
									84847	0.642078		129607	0.630551		55700	-0.635157
									3484	0.612624		129787	0.712171		79752	0.759811
									27099	0.667288		130827	1.02914		64430	-0.59722
									312	-1.20567		133688	-1.38219		83448	0.661858
									2247	0.654567		134111	-1.33595		55269	-0.722824
									7274	-0.929634		134526	-2.05485		81502	0.884152
									1522	-0.709079		134548	-1.16709		23564	-0.670152
									10154	-0.928718		135932	-1.4534		8825	-0.65083
									635	-1.18089		138428	0.70064		134548	-1.0754
									7276	-0.665966		138639	0.932691		7991	-0.711736
									729	-1.58828		139221	-0.981982		51594	0.592968
									4703	-1.57397		140738	-1.11348		9249	0.654821
									3273	-1.67519		140809	1.12547		80255	0.599039
									10974	-0.738306		140828	-0.606317		3913	-0.861533
									3638	1.08241		143686	-2.56123		79054	-0.639017
									3142	-0.617298		144501	-1.15006		92675	0.616366
									1839	-0.600571		144577	0.679694		81855	-0.723932
									2705	-0.708273		145389	0.708827		23220	-0.897451
									6568	-0.889625		145567	1.0871		5792	-0.603737
									622	-1.44973		145741	0.966777		56986	0.594356
									2158	-1.12923		145788	0.930693		10903	0.85294
									114571	-0.888871		147645	-0.746117		124152	0.644645
									54757	-0.710209		147727	0.6499		55350	1.03683
									221468	-0.61759		148156	1.00493		9886	-0.731467
									10272	-0.696656		148738	-1.59282		4247	0.590656
									10249	-0.847882		149041	-0.693344		6787	0.626141
									3434	-0.796851		150381	0.832829		56915	0.599258
									5168	-0.805654		152007	-2.04983		221035	-0.598169
									11000	-0.607627		152189	0.590115		5066	-0.635744
									140828	-0.616068		152195	0.667094		10678	-0.630968
									866	-0.925825		152518	0.963492		58155	-0.604973
									10590	0.97772		152926	0.625024		80176	-0.753503
									2941	-0.611814		153020	-0.675496		92521	-0.778856
									716	-0.603054		153241	0.721626		420	-0.809149
									1576	-1.34372		154091	-1.07665		5613	-0.925574
									283316	-0.646884		154141	0.985535		730101	0.626307
									7042	-0.672371		154467	0.697674		55553	-0.863259
									8424	-0.602198		154796	-0.740205		9055	-0.83174
									10050	-1.03819		157574	1.01174		6898	1.84056
									1369	-0.753614		157753	-0.870596		148523	-0.588061
									3371	-1.33763		157869	-1.37479		85462	0.66919
									2	-0.888668		158219	0.708874		1917	-1.17056
									8743	-1.02112		160428	0.924953		11168	0.637214
									130013	-0.848467		161436	1.12799		18	-0.628395
									9963	-0.694606		161582	0.628646		9942	0.751211
									7069	-1.33383		161835	2.02735		84187	-0.615583
									200931	-1.03503		162394	1.29366		54757	-0.736866
									1917	-0.651424		163183	-1.03637		283316	-0.635456
									3827	-1.70789		164832	0.94248		8339	-0.639067
									56892	-0.600658		166336	-2.07525		339559	0.648025
									127	-2.0316		166379	0.701093		1152	-0.974881
									8529	-0.671159		166824	0.99883		10426	0.671591
									5267	-0.619277		166929	0.724683		57045	-0.745604
									55089	-0.837283		170691	-0.638915		389932	-0.896694
									57733	-1.74588		171586	0.919468		22862	0.73905
									1733	-1.23366		196383	-0.779914		10301	0.605701
									1571	-1.61047		197259	0.879504		10769	-0.611206
									91860	-0.614532		199920	-2.20253		81606	-1.73814
									10247	-0.617878		200010	-1.25775		5909	-0.63842
									84647	-0.650598		200373	-0.947836		100506965	-0.933557
									130	-1.09402		200634	-0.616426		8565	0.636374
									4688	-0.626264		200728	0.812649		81788	-1.22414
									2329	-0.601361		200879	-1.12661		4091	-0.629137
									735	-1.33768		200942	-0.622525		55146	0.611177
									64902	-0.945001		201161	0.792303		3175	-0.741462
									7447	-0.777715		201266	0.650808		3590	-0.589266
												201973	0.642025		56906	0.698296
												203111	-0.61794		169792	-0.612138
												203197	0.624438		201973	0.79091
												203228	1.21097		54885	0.60898
												203523	0.645457		3033	0.676979
												219699	2.28695		54504	-0.632587
												219854	0.588017		400451	0.701111
												220323	0.928883		283	1.3681
												220930	1.00511		29015	-0.791737
												220965	-1.36865		23158	-0.600973
												221035	-0.669876		7043	-0.702664
												221120	0.739905		2026	-0.702897
												221468	-0.587409		1122	-0.88536
												221710	0.817134		79669	-0.618758
												221786	-0.61885		5414	0.678653
												222643	-0.877697		148738	-1.05096
												245972	1.31608		51760	0.762356
												252983	-0.771347		100130958	-0.651196
												252995	-1.35859		348751	0.655115
												253039	1.03378		84188	-0.772239
												253827	-0.952952		54899	0.612529
												254013	0.819624		145173	-0.694448
												256380	-1.32864		467	0.729099
												256471	0.653208		442524	0.740043
												256764	-0.709657		27122	-0.749573
												257407	-0.648467		3855	-1.32154
												259173	0.871246		84777	1.09544
												259230	-0.676489		3556	-0.610348
												266812	-0.876331		119392	0.886973
												282679	0.59889		170954	-0.660875
												283104	1.17033		155066	-0.586484
												283209	-0.956304		79817	0.666345
												284119	-0.888935		51765	-0.742421
												284207	-0.687143		219749	0.633805
												284309	-0.84934		1589	-0.997196
												284422	-1.85237		29902	-0.649821
												284454	-0.597006		3426	-1.22394
												285016	-2.43048		1409	-1.5127
												285489	-0.991836		8856	1.00063
												285556	1.07609		255738	0.714327
												286343	0.590531		200728	0.671566
												339324	-0.647592		10019	0.660166
												339559	0.693834		23125	0.760218
												341405	1.19939		10970	0.719017
												342035	-1.52378		146456	0.961444
												342892	-0.605645		55902	0.756288
												348235	-0.94359		174	-0.604442
												348751	0.611249		2281	-0.705949
												359845	-0.748375		29965	-0.640019
												374378	-0.644989		3717	1.06407
												374654	-0.592141		6103	0.641279
												374659	0.891287		54733	-0.759894
												374819	-0.750867		NA	0.667687
												375056	0.871664		114991	-0.730208
												375449	-0.779627		8877	-1.08305
												377677	0.713498		6624	-1.31334
												387758	2.38196		8343	-0.646771
												387882	-1.86428		771	0.667926
												388115	-1.16286		2296	-0.625468
												388335	0.884941		1368	0.728365
												388403	-1.36869		90550	-0.591004
												388743	1.31939		3728	-0.620139
												389084	0.637358		3123	-0.698384
												389332	-0.847767		55859	-0.614009
												389792	-0.638045		9858	0.636809
												389932	-0.764419		5026	-0.731424
												399664	-0.849585		9874	0.618974
												399818	0.618912		64743	0.617674
												400236	0.831798		83733	-1.13763
												400916	0.723351		9650	0.73288
												401081	-1.17976		57559	0.784307
												401152	-0.683527		1952	-0.642875
												401237	-0.592453		716	-0.840706
												401491	1.1299		3034	1.20864
												401548	-0.58909		8406	-0.746826
												440026	0.751785		10263	0.99241
												440836	0.886933		56931	0.679131
												441024	0.710923		51200	-0.945866
												541578	0.697944		339221	0.60568
												548645	0.662601		54	-0.683227
												619279	-0.59744		5744	-1.17247
												641638	0.661862		22824	-0.645821
												643837	0.788463		57834	0.707376
												643911	1.03764		3087	-0.700962
												644246	0.66644		10866	-0.604825
												649446	0.586595		1173	-0.645886
												652995	-1.01107		10892	-0.772665
												692227	0.827504		5140	-0.670701
												727936	-1.14787		6296	0.640459
												728730	0.634122		26291	0.804538
												729970	-0.863535		6347	-1.46952
												730102	-0.815397		54544	-0.894597
												730755	-1.01907		51339	-1.3612
												100049716	0.910664		173	-1.67001
												100128822	0.6531		2286	0.848806
												100129104	0.934082		55137	0.613926
												100131733	1.07264		462	2.40498
												100132815	-0.602337		3306	-0.753065
												100287177	1.01212		151473	-0.763789
												100288911	-1.31913		6001	-1.15445
												100306951	0.58881		NA	-0.711628
												100500850	-0.69145		4330	-0.700527
												100505483	1.20019		10599	-0.716906
												100505783	0.984677		57571	-0.656157
												100505854	0.644121		435	0.676687
												100505985	-1.15024		118980	0.659765
												100506029	0.803512		54843	-0.652923
												100506161	0.789777		8659	-0.700848
												100506314	0.698833		5104	-0.924031
												100506325	0.829838		27324	0.835693
												100506342	0.828821		4143	0.793967
												100506844	1.28548		122786	-0.937373
												100506860	0.765141		4801	-0.702331
												100506963	0.67887		2012	0.591171
												100506965	-0.86335		64073	0.960623
												100507297	0.592807		2247	0.796939
												100507389	1.68383		253943	-0.605926
												100507399	0.802658		284207	-0.933457
												100507410	-0.588942		4069	-1.30835
												100507421	-1.07188		388327	0.631017
												100507487	-1.79522		8858	-0.586709
												100507557	0.919352		2571	-1.13465
												NA	-0.685132		154743	-0.683122
												NA	0.782424		79799	-0.992602
												NA	0.801351		22911	-0.629678
												NA	0.642135		283130	0.613926
												NA	-1.36799		57205	-0.836163
												NA	-1.42506		2997	-0.609279
															6520	0.86095
															50807	-0.658433
															84915	0.670011
															153241	0.79221
															383	-1.65817
															64761	0.622857
															6868	0.654585
															90355	-0.911974
															2274	0.65041
															10912	0.597348
															64081	-1.0752
															100507389	2.55635
															25825	-0.917736
															84969	0.6671
															6723	0.639777
															10313	0.785972
															8310	-0.614763
															163126	-0.667591
															11146	-0.623267
															2564	-0.747737
															116461	0.720136
															64284	-0.603956
															7366	-1.06847
															57538	-0.644027
															2539	-0.60451
															130827	0.648912
															6300	-0.652809
															23467	-0.691931
															79574	-0.725732
															6195	-0.623086
															8344	-0.602201
															58476	-0.901542
															554279	-1.04812
															81706	0.880095
															3698	-0.866531
															133688	-1.21548
															6568	-0.753055
															3157	0.838928
															8876	0.588645
															306	-1.16414
															196410	-0.721229
															154	0.639109
															29995	0.585469
															8835	-1.01676
															100505854	0.605305
															145837	1.29039
															80117	0.612942
															60489	-0.596068
															4856	-0.888099
															4253	1.00291
															4688	-1.1156
															374819	-1.05665
															23530	-0.632148
															64859	-0.748106
															1582	-1.95276
															283104	0.764002
															10576	-0.592749
															203228	0.610682
															965	0.603038
															732	-1.2258
															6480	-0.646204
															3914	0.587963
															221710	0.59156
															221981	-0.9124
															55825	0.815576
															23406	-1.08794
															1474	-0.716584
															432	0.617452
															79586	0.780703
															6653	0.76954
															84141	-0.971842
															2113	0.595832
															100507399	0.728241
															2158	-1.02572
															6591	-1.07151
															5670	-1.00742
															9771	0.71848
															5446	-0.705375
															54363	0.932496
															56271	0.78112
															79888	-0.77141
															1	0.783888
															3038	-0.636019
															27344	-0.677941
															2259	0.590648
															1366	0.781314
															2051	-0.731309
															901	-0.635021
															8424	0.987532
															200765	-0.727988
															80127	0.658718
															8346	-0.657945
															440993	0.593762
															5629	-0.873259
															1787	0.652836
															116842	-0.594166
															3638	0.995694
															5168	-0.767054
															2	-0.706028
															1326	-0.856017
															5502	-0.720903
															8519	-1.10499
															284454	-0.606802
															4065	0.688369
															715	-0.773786
															201283	0.752614
															10050	-1.00877
															58499	-0.706118
															7448	-0.809964
															58526	-0.711152
															1576	-0.777703
															84735	0.770117
															710	0.700873
															4703	-1.01566
															11080	-0.615942
															84649	-0.86726
															401081	-1.0274
															7678	-0.827621
															9296	-0.606901
															117153	-0.653198
															1644	0.829082
															5444	-0.638521
															3627	-0.906904
															1610	-0.677073
															8323	-0.593368
															5376	-0.61886
															11223	0.6081
															3818	0.590525
															9912	-0.627204
															684	-0.619758
															166824	0.681153
															132321	-0.605498
															4547	0.638609
															6519	0.926318
															3827	-1.1152
															9015	0.623251
															8706	-0.620507
															729	-1.39151
															54578	-0.632575
															1264	-0.746265
															2165	-0.913693
															7620	-0.645924
															12	0.722643
															8615	0.590057
															81494	-0.98266
															2168	1.82114
															100506312	0.620064
															9027	-0.613676
															373	-0.608986
															622	-0.635109
															54886	-0.858239
															55435	0.610272
															100506897	0.588013
															10974	-0.709046
															51733	0.693243
															10249	-0.65328
															5366	-0.806523
