# Supplementary material
Source: publisher figshare collection journal article supplement (https://acs.figshare.com/ndownloader/files/6979565)
Supplement: Supplementary file 2 [file 6979565 › Table S2.xlsx]

## Sheet: Sheet1
	Enriched pathway-based sets: 818 genes (65.8%) from the input list are present in at least one pathway.
	pathway name	set size	candidates contained	p-value	q-value	pathway source
	Complement and coagulation cascades - Homo sapiens (human)	69	25 (36.2%)	5.14e-12	9.89e-09	KEGG
	Human Complement System	90	28 (31.1%)	1.91e-11	1.84e-08	Wikipathways
	Protein processing in endoplasmic reticulum - Homo sapiens (human)	169	38 (22.6%)	2.24e-10	1.44e-07	KEGG
	Complement and Coagulation Cascades	60	20 (33.3%)	3.81e-09	1.83e-06	Wikipathways
	Regulation of Complement cascade	24	12 (50.0%)	2.54e-08	9.79e-06	Reactome
	Nuclear Receptors Meta-Pathway	314	50 (15.9%)	1.16e-07	3.73e-05	Wikipathways
	Metapathway biotransformation	177	34 (19.2%)	1.52e-07	4.17e-05	Wikipathways
	intrinsic prothrombin activation pathway	23	11 (47.8%)	1.77e-07	4.26e-05	BioCarta
	Acetaminophen Metabolism Pathway	31	12 (40.0%)	5.4e-07	0.000115	SMPDB
	Beta1 integrin cell surface interactions	66	18 (27.3%)	7.04e-07	0.000135	PID
	Common Pathway of Fibrin Clot Formation	22	10 (45.5%)	1.18e-06	0.000207	Reactome
	Irinotecan Action Pathway	23	10 (43.5%)	1.95e-06	0.000288	SMPDB
	Irinotecan Metabolism Pathway	23	10 (43.5%)	1.95e-06	0.000288	SMPDB
	Formation of Fibrin Clot (Clotting Cascade)	39	13 (33.3%)	2.09e-06	0.000288	Reactome
	Vitamin D Receptor Pathway	184	32 (17.5%)	3.02e-06	0.000382	Wikipathways
	Sorafenib Metabolism Pathway	15	8 (53.3%)	3.18e-06	0.000382	SMPDB
	Parkin-Ubiquitin Proteasomal System pathway	73	18 (24.7%)	3.47e-06	0.000393	Wikipathways
	Glycine Serine metabolism	41	13 (31.7%)	3.96e-06	0.000423	INOH
	Drug metabolism - cytochrome P450 - Homo sapiens (human)	68	17 (25.0%)	5.28e-06	0.000535	KEGG
	Morphine Metabolism Pathway	16	8 (50.0%)	5.95e-06	0.000573	SMPDB
	Complement Activation, Classical Pathway	17	8 (47.1%)	1.05e-05	0.000965	Wikipathways
	extrinsic prothrombin activation pathway	13	7 (53.8%)	1.26e-05	0.0011	BioCarta
	Ibuprofen Metabolism Pathway	23	9 (39.1%)	1.82e-05	0.00152	SMPDB
	classical complement pathway	14	7 (50.0%)	2.36e-05	0.00162	BioCarta
	alternative complement pathway	10	6 (60.0%)	2.43e-05	0.00162	BioCarta
	Gamma-carboxylation, transport, and amino-terminal cleavage of proteins	10	6 (60.0%)	2.43e-05	0.00162	Reactome
	Direct p53 effectors	141	25 (17.7%)	2.81e-05	0.00162	PID
	Etoposide Action Pathway	19	8 (42.1%)	2.87e-05	0.00162	SMPDB
	Etoposide Metabolism Pathway	19	8 (42.1%)	2.87e-05	0.00162	SMPDB
	Terminal pathway of complement	7	5 (71.4%)	3.82e-05	0.00162	Reactome
	ATF4 activates genes	7	5 (71.4%)	3.82e-05	0.00162	Wikipathways
	Beta3 integrin cell surface interactions	43	12 (27.9%)	3.95e-05	0.00162	PID
	Phase 1 - Functionalization of compounds	79	17 (21.5%)	4.38e-05	0.00162	Reactome
	Bivalirudin Action Pathway	20	8 (40.0%)	4.48e-05	0.00162	SMPDB
	Argatroban Action Pathway	20	8 (40.0%)	4.48e-05	0.00162	SMPDB
	Ximelagatran Action Pathway	20	8 (40.0%)	4.48e-05	0.00162	SMPDB
	Lepirudin Action Pathway	20	8 (40.0%)	4.48e-05	0.00162	SMPDB
	Coagulation	20	8 (40.0%)	4.48e-05	0.00162	SMPDB
	Aminocaproic Acid Action Pathway	20	8 (40.0%)	4.48e-05	0.00162	SMPDB
	Tranexamic Acid Action Pathway	20	8 (40.0%)	4.48e-05	0.00162	SMPDB
	Urokinase Action Pathway	20	8 (40.0%)	4.48e-05	0.00162	SMPDB
	Reteplase Action Pathway	20	8 (40.0%)	4.48e-05	0.00162	SMPDB
	Streptokinase Action Pathway	20	8 (40.0%)	4.48e-05	0.00162	SMPDB
	Tenecteplase Action Pathway	20	8 (40.0%)	4.48e-05	0.00162	SMPDB
	Alteplase Action Pathway	20	8 (40.0%)	4.48e-05	0.00162	SMPDB
	Anistreplase Action Pathway	20	8 (40.0%)	4.48e-05	0.00162	SMPDB
	Aprotinin Action Pathway	20	8 (40.0%)	4.48e-05	0.00162	SMPDB
	Phenindione Action Pathway	20	8 (40.0%)	4.48e-05	0.00162	SMPDB
	Dicoumarol Action Pathway	20	8 (40.0%)	4.48e-05	0.00162	SMPDB
	Warfarin Action Pathway	20	8 (40.0%)	4.48e-05	0.00162	SMPDB
	Acenocoumarol Action Pathway	20	8 (40.0%)	4.48e-05	0.00162	SMPDB
	Phenprocoumon Action Pathway	20	8 (40.0%)	4.48e-05	0.00162	SMPDB
	Dicumarol Action Pathway	20	8 (40.0%)	4.48e-05	0.00162	SMPDB
	Biological oxidations	185	29 (16.0%)	4.77e-05	0.0017	Reactome
	Proteasome - Homo sapiens (human)	44	12 (27.3%)	5.07e-05	0.00177	KEGG
	TGF-beta signaling pathway - Homo sapiens (human)	80	17 (21.2%)	5.19e-05	0.00178	KEGG
	Tryptophan degradation	66	15 (22.7%)	6.28e-05	0.00212	INOH
	Ardeparin Action Pathway	21	8 (38.1%)	6.77e-05	0.00213	SMPDB
	Heparin Action Pathway	21	8 (38.1%)	6.77e-05	0.00213	SMPDB
	Fondaparinux Action Pathway	21	8 (38.1%)	6.77e-05	0.00213	SMPDB
	Enoxaparin Action Pathway	21	8 (38.1%)	6.77e-05	0.00213	SMPDB
	Metabolism of xenobiotics by cytochrome P450 - Homo sapiens (human)	74	16 (21.6%)	6.88e-05	0.00213	KEGG
	Phenytoin (Antiarrhythmic) Action Pathway	82	17 (20.7%)	7.22e-05	0.00221	SMPDB
	TGF-beta super family signaling pathway canonical	115	21 (18.3%)	7.77e-05	0.00234	INOH
	Extracellular matrix organization	264	37 (14.1%)	8.48e-05	0.00251	Reactome
	lectin induced complement pathway	12	6 (50.0%)	9.41e-05	0.00271	BioCarta
	Gefitinib Pathway, Pharmacokinetics	8	5 (62.5%)	9.56e-05	0.00271	PharmGKB
	Glycine, serine and threonine metabolism - Homo sapiens (human)	40	11 (27.5%)	9.58e-05	0.00271	KEGG
	Legionellosis - Homo sapiens (human)	55	13 (23.6%)	0.000125	0.00349	KEGG
	Alanine, aspartate and glutamate metabolism - Homo sapiens (human)	35	10 (28.6%)	0.00014	0.00385	KEGG
	Regulation of lipid metabolism by Peroxisome proliferator-activated receptor alpha (PPARalpha)	42	11 (26.2%)	0.000155	0.0042	Wikipathways
	Pentose and glucuronate interconversions - Homo sapiens (human)	36	10 (27.8%)	0.000181	0.00484	KEGG
	Ibuprofen Action Pathway	50	12 (24.0%)	0.000194	0.00492	SMPDB
	Beta2 integrin cell surface interactions	30	9 (30.0%)	0.0002	0.00492	PID
	proteasome complex	24	8 (33.3%)	0.000201	0.00492	BioCarta
	IL1 and megakaryotyces in obesity	24	8 (33.3%)	0.000201	0.00492	Wikipathways
	DroToll-like	65	14 (21.5%)	0.000202	0.00492	INOH
	Gamma-carboxylation of protein precursors	9	5 (55.6%)	0.000202	0.00492	Reactome
	Removal of aminoterminal propeptides from gamma-carboxylated proteins	9	5 (55.6%)	0.000202	0.00492	Reactome
	Chemical carcinogenesis - Homo sapiens (human)	81	16 (19.8%)	0.000212	0.00507	KEGG
	Metabolism of amino acids and derivatives	150	24 (16.0%)	0.000214	0.00507	Reactome
	Tyrosine metabolism	106	19 (17.9%)	0.000216	0.00507	EHMN
	Steroid hormone biosynthesis - Homo sapiens (human)	58	13 (22.4%)	0.000222	0.00515	KEGG
	Vitamin A Deficiency	37	10 (27.0%)	0.000232	0.00526	SMPDB
	Retinol Metabolism	37	10 (27.0%)	0.000232	0.00526	SMPDB
	HIF-1-alpha transcription factor network	66	14 (21.2%)	0.000239	0.00529	PID
	Integrin cell surface interactions	67	14 (21.2%)	0.000239	0.00529	Reactome
	Platelet degranulation	82	16 (19.5%)	0.000246	0.00538	Reactome
	Warfarin Pathway, Pharmacodynamics	14	6 (42.9%)	0.000269	0.00582	PharmGKB
	Bile acid biosynthesis	53	12 (22.6%)	0.000348	0.00745	EHMN
	Phenytoin Pathway, Pharmacokinetics	20	7 (35.0%)	0.000361	0.00763	PharmGKB
	methylglyoxal degradation III	3	3 (100.0%)	0.000389	0.00813	HumanCyc
	Fatty Acid Omega Oxidation	15	6 (40.0%)	0.000421	0.00871	Wikipathways
	IL6-mediated signaling events	47	11 (23.4%)	0.000451	0.00913	PID
	TLR NFkB	70	14 (20.0%)	0.000454	0.00913	INOH
	Response to elevated platelet cytosolic Ca2+	87	16 (18.4%)	0.000495	0.00913	Reactome
	Glutamate Glutamine metabolism	27	8 (29.6%)	0.000498	0.00913	INOH
	3-Phosphoglycerate dehydrogenase deficiency	27	8 (29.6%)	0.000498	0.00913	SMPDB
	Non Ketotic Hyperglycinemia	27	8 (29.6%)	0.000498	0.00913	SMPDB
	Glycine and Serine Metabolism	27	8 (29.6%)	0.000498	0.00913	SMPDB
	Dimethylglycine Dehydrogenase Deficiency	27	8 (29.6%)	0.000498	0.00913	SMPDB
	Hyperglycinemia, non-ketotic	27	8 (29.6%)	0.000498	0.00913	SMPDB
	Dimethylglycine Dehydrogenase Deficiency	27	8 (29.6%)	0.000498	0.00913	SMPDB
	Sarcosinemia	27	8 (29.6%)	0.000498	0.00913	SMPDB
	Dihydropyrimidine Dehydrogenase Deficiency (DHPD)	27	8 (29.6%)	0.000498	0.00913	SMPDB
	Tamoxifen metabolism	21	7 (33.3%)	0.000507	0.00921	Wikipathways
	TLR JNK	63	13 (20.6%)	0.000525	0.00944	INOH
	BMP receptor signaling	41	10 (24.4%)	0.000573	0.0102	PID
	TLR p38	64	13 (20.3%)	0.000615	0.0109	INOH
	Metabolism	1481	139 (9.4%)	0.000664	0.0116	Reactome
	Elastic fibre formation	36	9 (25.7%)	0.00071	0.0123	Reactome
	Retinol metabolism - Homo sapiens (human)	65	13 (20.0%)	0.000719	0.0123	KEGG
	Caffeine Metabolism	7	4 (57.1%)	0.000828	0.0141	SMPDB
	Cyclophosphamide Pathway, Pharmacodynamics	17	6 (35.3%)	0.000918	0.0155	PharmGKB
	Protein export - Homo sapiens (human)	23	7 (30.4%)	0.00094	0.0156	KEGG
	Xenobiotics metabolism	51	11 (21.6%)	0.000942	0.0156	EHMN
	Molecules associated with elastic fibres	31	8 (26.7%)	0.00108	0.0178	Reactome
	p53 signaling pathway - Homo sapiens (human)	68	13 (19.1%)	0.00112	0.0183	KEGG
	Antigen processing and presentation - Homo sapiens (human)	77	14 (18.2%)	0.00123	0.0196	KEGG
	NRF2 pathway	140	21 (15.0%)	0.00123	0.0196	Wikipathways
	Pathway_PA165986194 -need delete	24	7 (29.2%)	0.00125	0.0196	PharmGKB
	Acetaminophen Pathway, Pharmacokinetics	24	7 (29.2%)	0.00125	0.0196	PharmGKB
	BMP Signalling Pathway	18	6 (33.3%)	0.00129	0.0202	HumanCyc
	Leukotriene metabolism	104	17 (16.3%)	0.00135	0.0209	EHMN
	Notch	79	14 (17.9%)	0.0014	0.0215	INOH
	Theophylline Pathway, Pharmacokinetics	4	3 (75.0%)	0.00147	0.0224	PharmGKB
	Tryptophan metabolism	46	10 (21.7%)	0.00149	0.0226	Wikipathways
	Warfarin Pathway, Pharmacokinetics	8	4 (50.0%)	0.00156	0.0229	PharmGKB
	Caffeine Pathway, Pharmacokinetics	8	4 (50.0%)	0.00156	0.0229	PharmGKB
	Transport of gamma-carboxylated protein precursors from the endoplasmic reticulum to the Golgi apparatus	8	4 (50.0%)	0.00156	0.0229	Reactome
	Glucose-Alanine Cycle	8	4 (50.0%)	0.00156	0.0229	SMPDB
	Alanine Aspartate Asparagine metabolism	25	7 (28.0%)	0.00162	0.0236	INOH
	Bile secretion - Homo sapiens (human)	72	13 (18.1%)	0.00193	0.0278	KEGG
	Linoleate metabolism	72	13 (18.1%)	0.00193	0.0278	EHMN
	Binding and Uptake of Ligands by Scavenger Receptors	40	9 (22.5%)	0.00198	0.028	Reactome
	Tryptophan metabolism - Homo sapiens (human)	40	9 (22.5%)	0.00198	0.028	KEGG
	Proteasome Degradation	64	12 (18.8%)	0.00204	0.0287	Wikipathways
	Pregnane X Receptor pathway	33	8 (24.2%)	0.00211	0.0294	Wikipathways
	Amoebiasis - Homo sapiens (human)	109	17 (15.6%)	0.00227	0.0314	KEGG
	Ifosfamide Pathway, Pharmacodynamics	14	5 (35.7%)	0.00236	0.0322	PharmGKB
	fibrinolysis pathway	14	5 (35.7%)	0.00236	0.0322	BioCarta
	Zidovudine Pathway, Pharmacokinetics/Pharmacodynamics	20	6 (30.0%)	0.00238	0.0322	PharmGKB
	Complement cascade	84	14 (16.9%)	0.00257	0.0339	Reactome
	Porphyrin metabolism	34	8 (23.5%)	0.00258	0.0339	EHMN
	Butanoate metabolism - Homo sapiens (human)	27	7 (25.9%)	0.00264	0.0339	KEGG
	alk in cardiac myocytes	27	7 (25.9%)	0.00264	0.0339	BioCarta
	Ascorbate and aldarate metabolism - Homo sapiens (human)	27	7 (25.9%)	0.00264	0.0339	KEGG
	Erlotinib Pathway, Pharmacokinetics	9	4 (44.4%)	0.00265	0.0339	PharmGKB
	Clopidogrel Metabolism Pathway	9	4 (44.4%)	0.00265	0.0339	SMPDB
	Clopidogrel Action Pathway	9	4 (44.4%)	0.00265	0.0339	SMPDB
	Retinoid metabolism and transport	42	9 (21.4%)	0.00283	0.0358	Reactome
	Non-integrin membrane-ECM interactions	42	9 (21.4%)	0.00283	0.0358	Reactome
	Focal Adhesion	190	25 (13.2%)	0.00293	0.0368	Wikipathways
	Adipogenesis	131	19 (14.5%)	0.00304	0.038	Wikipathways
	Signaling by BMP	21	6 (28.6%)	0.00313	0.0388	Reactome
	Unfolded Protein Response (UPR)	15	5 (33.3%)	0.00333	0.041	Reactome
	Syndecan-1-mediated signaling events	43	9 (20.9%)	0.00335	0.041	PID
	ATF6-alpha activates chaperone genes	5	3 (60.0%)	0.00347	0.041	Wikipathways
	tyrosine degradation	5	3 (60.0%)	0.00347	0.041	HumanCyc
	Catalytic cycle of mammalian FMOs	5	3 (60.0%)	0.00347	0.041	Wikipathways
	ketolysis	5	3 (60.0%)	0.00347	0.041	HumanCyc
	Abacavir transmembrane transport	5	3 (60.0%)	0.00347	0.041	Reactome
	retinoate biosynthesis II	5	3 (60.0%)	0.00347	0.041	HumanCyc
	Prion diseases - Homo sapiens (human)	36	8 (22.2%)	0.00378	0.0443	KEGG
	Morphine Action Pathway	44	9 (20.5%)	0.00394	0.0454	SMPDB
	ECM-receptor interaction - Homo sapiens (human)	87	14 (16.1%)	0.00401	0.0454	KEGG
	Glycine, serine, alanine and threonine metabolism	78	13 (16.7%)	0.00401	0.0454	EHMN
	Lysine degradation	22	6 (27.3%)	0.00404	0.0454	INOH
	Doxorubicin Pathway, Pharmacokinetics	22	6 (27.3%)	0.00404	0.0454	PharmGKB
	Intrinsic Pathway of Fibrin Clot Formation	22	6 (27.3%)	0.00404	0.0454	Reactome
	Blood Clotting Cascade	22	6 (27.3%)	0.00404	0.0454	Wikipathways
	IRE1alpha activates chaperones	10	4 (40.0%)	0.00416	0.0462	Reactome
	noradrenaline and adrenaline degradation	10	4 (40.0%)	0.00416	0.0462	HumanCyc
	Cytochrome P450 - arranged by substrate type	61	11 (18.0%)	0.00424	0.0469	Reactome
	Apoptosis-related network due to altered Notch3 in ovarian cancer	53	10 (18.9%)	0.00449	0.0494	Wikipathways
	Carbamazepine Pathway, Pharmacokinetics	16	5 (31.2%)	0.00455	0.0498	PharmGKB
	Glucocorticoid Receptor Pathway	71	12 (16.9%)	0.00499	0.0536	Wikipathways
	Fructose Mannose metabolism	30	7 (23.3%)	0.00499	0.0536	INOH
	Oxidative Stress	30	7 (23.3%)	0.00499	0.0536	Wikipathways
	Di-unsaturated fatty acid beta-oxidation	23	6 (26.1%)	0.00513	0.0548	EHMN
	Felbamate Metabolism	2	2 (100.0%)	0.00533	0.0558	Wikipathways
	Viral RNP Complexes in the Host Cell Nucleus	2	2 (100.0%)	0.00533	0.0558	Reactome
	Degradation of GABA	2	2 (100.0%)	0.00533	0.0558	Reactome
	4-aminobutyrate degradation	2	2 (100.0%)	0.00533	0.0558	HumanCyc
	IL-1 JNK	63	11 (17.5%)	0.00547	0.0569	INOH
	TGF Beta Signaling Pathway	55	10 (18.2%)	0.00591	0.0608	Wikipathways
	Amino acid transport across the plasma membrane	31	7 (22.6%)	0.00604	0.0608	Reactome
	Doxorubicin Metabolism Pathway	17	5 (29.4%)	0.00607	0.0608	SMPDB
	Drug Induction of Bile Acid Pathway	17	5 (29.4%)	0.00607	0.0608	Wikipathways
	Imatinib Pathway, Pharmacokinetics/Pharmacodynamics	11	4 (36.4%)	0.00616	0.0608	PharmGKB
	Phenylalanine and Tyrosine Metabolism	11	4 (36.4%)	0.00616	0.0608	SMPDB
	Phenylketonuria	11	4 (36.4%)	0.00616	0.0608	SMPDB
	Tyrosinemia Type 3 (TYRO3)	11	4 (36.4%)	0.00616	0.0608	SMPDB
	Tyrosinemia Type 2 (or Richner-Hanhart syndrome)	11	4 (36.4%)	0.00616	0.0608	SMPDB
	3-oxo-10R-octadecatrienoate beta-oxidation	11	4 (36.4%)	0.00616	0.0608	EHMN
	Triglyceride Biosynthesis	47	9 (19.1%)	0.00623	0.0612	Reactome
	Vitamin digestion and absorption - Homo sapiens (human)	24	6 (25.0%)	0.00643	0.0628	KEGG
	Starch and sucrose metabolism - Homo sapiens (human)	56	10 (17.9%)	0.00673	0.0654	KEGG
	IL-1 NFkB	65	11 (16.9%)	0.00696	0.0673	INOH
	Metabolism of lipids and lipoproteins	517	53 (10.3%)	0.00699	0.0673	Reactome
	Constitutive Androstane Receptor Pathway	32	7 (21.9%)	0.00726	0.0688	Wikipathways
	Fructose and mannose metabolism - Homo sapiens (human)	32	7 (21.9%)	0.00726	0.0688	KEGG
	TGF-beta receptor signaling activates SMADs	32	7 (21.9%)	0.00726	0.0688	Reactome
	C21-steroid hormone biosynthesis and metabolism	57	10 (17.5%)	0.00765	0.0721	EHMN
	Doxorubicin Pathway (Cancer Cell), Pharmacodynamics	18	5 (27.8%)	0.0079	0.0735	PharmGKB
	Tamoxifen Pathway, Pharmacokinetics	18	5 (27.8%)	0.0079	0.0735	PharmGKB
	Cellular response to heat stress	18	5 (27.8%)	0.0079	0.0735	Wikipathways
	Disulfiram Action Pathway	25	6 (24.0%)	0.00794	0.0735	SMPDB
	Arginine and proline metabolism - Homo sapiens (human)	50	9 (18.4%)	0.00825	0.0755	KEGG
	Amino acid and oligopeptide SLC transporters	49	9 (18.4%)	0.00825	0.0755	Reactome
	Tyrosine metabolism	33	7 (21.2%)	0.00865	0.0787	INOH
	Scavenging of heme from plasma	12	4 (33.3%)	0.00871	0.0787	Reactome
	IL-1 p38	67	11 (16.4%)	0.00876	0.0787	INOH
	TNF	67	11 (16.4%)	0.00876	0.0787	INOH
	Focal adhesion - Homo sapiens (human)	207	25 (12.1%)	0.00884	0.0791	KEGG
	TGF-beta receptor signaling	50	9 (18.0%)	0.00942	0.0839	PID
	Basigin interactions	27	6 (23.1%)	0.0097	0.0848	Reactome
	Downregulation of TGF-beta receptor signaling	26	6 (23.1%)	0.0097	0.0848	Reactome
	Vitamin A (retinol) metabolism	26	6 (23.1%)	0.0097	0.0848	EHMN
	Glucuronidation	26	6 (23.1%)	0.0097	0.0848	Wikipathways
	Glycerolipid metabolism - Homo sapiens (human)	59	10 (16.9%)	0.00976	0.0849	KEGG
