# Supplementary material
Source: publisher figshare collection journal article supplement (https://acs.figshare.com/ndownloader/files/6979565)
Supplement: Supplementary file 2 [file 6979565 › Table S3.xlsx]

## Sheet: Sheet2
	Enriched pathway-based sets: 868 genes (63.7%) from the input list are present in at least one pathway.
	pathway name	set size	candidates contained	p-value	q-value	pathway source
	Protein processing in endoplasmic reticulum - Homo sapiens (human)	169	44 (26.2%)	2.77e-13	5.52e-10	KEGG
	Complement and coagulation cascades - Homo sapiens (human)	69	26 (37.7%)	2.6e-12	2.59e-09	KEGG
	Human Complement System	90	27 (30.0%)	4.25e-10	2.83e-07	Wikipathways
	Complement and Coagulation Cascades	60	21 (35.0%)	1.63e-09	8.15e-07	Wikipathways
	intrinsic prothrombin activation pathway	23	12 (52.2%)	2.66e-08	1.06e-05	BioCarta
	Formation of Fibrin Clot (Clotting Cascade)	39	15 (38.5%)	8.36e-08	2.78e-05	Reactome
	Nuclear Receptors Meta-Pathway	314	52 (16.6%)	1.19e-07	3.39e-05	Wikipathways
	Common Pathway of Fibrin Clot Formation	22	11 (50.0%)	1.82e-07	4.53e-05	Reactome
	Irinotecan Action Pathway	23	11 (47.8%)	3.24e-07	6.47e-05	SMPDB
	Irinotecan Metabolism Pathway	23	11 (47.8%)	3.24e-07	6.47e-05	SMPDB
	Regulation of Complement cascade	24	11 (45.8%)	5.57e-07	0.000101	Reactome
	Morphine Metabolism Pathway	16	9 (56.2%)	6.75e-07	0.000112	SMPDB
	Ardeparin Action Pathway	21	10 (47.6%)	1.19e-06	0.000149	SMPDB
	Heparin Action Pathway	21	10 (47.6%)	1.19e-06	0.000149	SMPDB
	Fondaparinux Action Pathway	21	10 (47.6%)	1.19e-06	0.000149	SMPDB
	Enoxaparin Action Pathway	21	10 (47.6%)	1.19e-06	0.000149	SMPDB
	ATF4 activates genes	7	6 (85.7%)	1.4e-06	0.000164	Wikipathways
	Beta1 integrin cell surface interactions	66	18 (27.3%)	1.67e-06	0.00018	PID
	3-Phosphoglycerate dehydrogenase deficiency	27	11 (40.7%)	2.34e-06	0.00018	SMPDB
	Non Ketotic Hyperglycinemia	27	11 (40.7%)	2.34e-06	0.00018	SMPDB
	Glycine and Serine Metabolism	27	11 (40.7%)	2.34e-06	0.00018	SMPDB
	Dimethylglycine Dehydrogenase Deficiency	27	11 (40.7%)	2.34e-06	0.00018	SMPDB
	Hyperglycinemia, non-ketotic	27	11 (40.7%)	2.34e-06	0.00018	SMPDB
	Dimethylglycine Dehydrogenase Deficiency	27	11 (40.7%)	2.34e-06	0.00018	SMPDB
	Sarcosinemia	27	11 (40.7%)	2.34e-06	0.00018	SMPDB
	Dihydropyrimidine Dehydrogenase Deficiency (DHPD)	27	11 (40.7%)	2.34e-06	0.00018	SMPDB
	Asparagine N-linked glycosylation	118	25 (21.2%)	3.01e-06	0.000222	Reactome
	Bivalirudin Action Pathway	20	9 (45.0%)	7.46e-06	0.000317	SMPDB
	Argatroban Action Pathway	20	9 (45.0%)	7.46e-06	0.000317	SMPDB
	Ximelagatran Action Pathway	20	9 (45.0%)	7.46e-06	0.000317	SMPDB
	Lepirudin Action Pathway	20	9 (45.0%)	7.46e-06	0.000317	SMPDB
	Coagulation	20	9 (45.0%)	7.46e-06	0.000317	SMPDB
	Aminocaproic Acid Action Pathway	20	9 (45.0%)	7.46e-06	0.000317	SMPDB
	Tranexamic Acid Action Pathway	20	9 (45.0%)	7.46e-06	0.000317	SMPDB
	Urokinase Action Pathway	20	9 (45.0%)	7.46e-06	0.000317	SMPDB
	Reteplase Action Pathway	20	9 (45.0%)	7.46e-06	0.000317	SMPDB
	Streptokinase Action Pathway	20	9 (45.0%)	7.46e-06	0.000317	SMPDB
	Tenecteplase Action Pathway	20	9 (45.0%)	7.46e-06	0.000317	SMPDB
	Alteplase Action Pathway	20	9 (45.0%)	7.46e-06	0.000317	SMPDB
	Anistreplase Action Pathway	20	9 (45.0%)	7.46e-06	0.000317	SMPDB
	Aprotinin Action Pathway	20	9 (45.0%)	7.46e-06	0.000317	SMPDB
	Phenindione Action Pathway	20	9 (45.0%)	7.46e-06	0.000317	SMPDB
	Dicoumarol Action Pathway	20	9 (45.0%)	7.46e-06	0.000317	SMPDB
	Warfarin Action Pathway	20	9 (45.0%)	7.46e-06	0.000317	SMPDB
	Acenocoumarol Action Pathway	20	9 (45.0%)	7.46e-06	0.000317	SMPDB
	Phenprocoumon Action Pathway	20	9 (45.0%)	7.46e-06	0.000317	SMPDB
	Dicumarol Action Pathway	20	9 (45.0%)	7.46e-06	0.000317	SMPDB
	Acetaminophen Metabolism Pathway	31	11 (36.7%)	7.9e-06	0.000328	SMPDB
	Trans-sulfuration and one carbon metabolism	31	11 (35.5%)	1.14e-05	0.000464	Wikipathways
	Gamma-carboxylation of protein precursors	9	6 (66.7%)	1.46e-05	0.000583	Reactome
	Glutamate Glutamine metabolism	27	10 (37.0%)	1.86e-05	0.000714	INOH
	extrinsic prothrombin activation pathway	13	7 (53.8%)	1.86e-05	0.000714	BioCarta
	Metabolism of amino acids and derivatives	150	27 (18.0%)	2.96e-05	0.00111	Reactome
	Gamma-carboxylation, transport, and amino-terminal cleavage of proteins	10	6 (60.0%)	3.42e-05	0.00126	Reactome
	Warfarin Pathway, Pharmacodynamics	14	7 (50.0%)	3.47e-05	0.00126	PharmGKB
	Etoposide Action Pathway	19	8 (42.1%)	4.41e-05	0.00154	SMPDB
	Etoposide Metabolism Pathway	19	8 (42.1%)	4.41e-05	0.00154	SMPDB
	Fructose Mannose metabolism	30	10 (33.3%)	5.34e-05	0.00183	INOH
	Arginine Proline metabolism	55	14 (25.5%)	5.5e-05	0.00186	INOH
	Sorafenib Metabolism Pathway	15	7 (46.7%)	6.08e-05	0.00202	SMPDB
	Beta3 integrin cell surface interactions	43	12 (27.9%)	7.06e-05	0.00231	PID
	Transport of gamma-carboxylated protein precursors from the endoplasmic reticulum to the Golgi apparatus	8	5 (62.5%)	0.000127	0.00409	Reactome
	Intrinsic Pathway of Fibrin Clot Formation	22	8 (36.4%)	0.000151	0.00479	Reactome
	Complement Activation, Classical Pathway	17	7 (41.2%)	0.00016	0.00499	Wikipathways
	Synthesis of GDP-mannose	5	4 (80.0%)	0.000168	0.00509	Reactome
	tyrosine degradation	5	4 (80.0%)	0.000168	0.00509	HumanCyc
	Glycine Serine metabolism	41	11 (26.8%)	0.000207	0.00617	INOH
	Ibuprofen Metabolism Pathway	23	8 (34.8%)	0.000216	0.00634	SMPDB
	Regulation of lipid metabolism by Peroxisome proliferator-activated receptor alpha (PPARalpha)	42	11 (26.2%)	0.000261	0.00755	Wikipathways
	Removal of aminoterminal propeptides from gamma-carboxylated proteins	9	5 (55.6%)	0.000268	0.00763	Reactome
	Cytosolic tRNA aminoacylation	24	8 (33.3%)	0.000303	0.0085	Reactome
	Beta2 integrin cell surface interactions	30	9 (30.0%)	0.000313	0.00867	PID
	TGF-beta signaling pathway - Homo sapiens (human)	80	16 (20.0%)	0.000358	0.00977	KEGG
	classical complement pathway	14	6 (42.9%)	0.000373	0.00985	BioCarta
	Vitamin A Deficiency	37	10 (27.0%)	0.000376	0.00985	SMPDB
	Retinol Metabolism	37	10 (27.0%)	0.000376	0.00985	SMPDB
	Metabolism	1481	148 (10.0%)	0.00038	0.00985	Reactome
	Amino acid transport across the plasma membrane	31	9 (29.0%)	0.000411	0.0105	Reactome
	HIF-1-alpha transcription factor network	66	14 (21.2%)	0.00044	0.011	PID
	GDP-mannose biosynthesis	6	4 (66.7%)	0.000474	0.011	HumanCyc
	alternative complement pathway	10	5 (50.0%)	0.000502	0.011	BioCarta
	Post-translational protein modification	350	45 (12.9%)	0.000509	0.011	Reactome
	Hyperornithinemia with gyrate atrophy (HOGA)	20	7 (35.0%)	0.000519	0.011	SMPDB
	Creatine deficiency, guanidinoacetate methyltransferase deficiency	20	7 (35.0%)	0.000519	0.011	SMPDB
	L-arginine:glycine amidinotransferase deficiency	20	7 (35.0%)	0.000519	0.011	SMPDB
	Hyperornithinemia-hyperammonemia-homocitrullinuria [HHH-syndrome]	20	7 (35.0%)	0.000519	0.011	SMPDB
	Guanidinoacetate Methyltransferase Deficiency (GAMT Deficiency)	20	7 (35.0%)	0.000519	0.011	SMPDB
	Prolinemia Type II	20	7 (35.0%)	0.000519	0.011	SMPDB
	Prolidase Deficiency (PD)	20	7 (35.0%)	0.000519	0.011	SMPDB
	Arginine and Proline Metabolism	20	7 (35.0%)	0.000519	0.011	SMPDB
	Hyperprolinemia Type I	20	7 (35.0%)	0.000519	0.011	SMPDB
	Hyperprolinemia Type II	20	7 (35.0%)	0.000519	0.011	SMPDB
	Ornithine Aminotransferase Deficiency (OAT Deficiency)	20	7 (35.0%)	0.000519	0.011	SMPDB
	Arginine: Glycine Amidinotransferase Deficiency (AGAT Deficiency)	20	7 (35.0%)	0.000519	0.011	SMPDB
	Fructose and mannose metabolism - Homo sapiens (human)	32	9 (28.1%)	0.000533	0.0112	KEGG
	Bile acid biosynthesis	53	12 (22.6%)	0.000597	0.0124	EHMN
	Binding and Uptake of Ligands by Scavenger Receptors	40	10 (25.0%)	0.000739	0.0151	Reactome
	Triglyceride Biosynthesis	47	11 (23.4%)	0.000744	0.0151	Reactome
	Alpha6 beta4 integrin-ligand interactions	11	5 (45.5%)	0.000861	0.0165	PID
	Phenylalanine and Tyrosine Metabolism	11	5 (45.5%)	0.000861	0.0165	SMPDB
	Phenylketonuria	11	5 (45.5%)	0.000861	0.0165	SMPDB
	Tyrosinemia Type 3 (TYRO3)	11	5 (45.5%)	0.000861	0.0165	SMPDB
	Tyrosinemia Type 2 (or Richner-Hanhart syndrome)	11	5 (45.5%)	0.000861	0.0165	SMPDB
	Phytanic acid peroxisomal oxidation	16	6 (37.5%)	0.000868	0.0165	EHMN
	Omega-3 fatty acid metabolism	16	6 (37.5%)	0.000868	0.0165	EHMN
	Amino sugar and nucleotide sugar metabolism - Homo sapiens (human)	48	11 (22.9%)	0.000899	0.0169	KEGG
	Glucocorticoid Receptor Pathway	71	14 (19.7%)	0.000951	0.0177	Wikipathways
	Leukotriene metabolism	104	18 (17.3%)	0.000981	0.0181	EHMN
	Blood Clotting Cascade	22	7 (31.8%)	0.000995	0.0182	Wikipathways
	Terminal pathway of complement	7	4 (57.1%)	0.00104	0.0188	Reactome
	Arginine and proline metabolism - Homo sapiens (human)	50	11 (22.4%)	0.00108	0.0194	KEGG
	Non-integrin membrane-ECM interactions	42	10 (23.8%)	0.00111	0.0198	Reactome
	Fatty acid, triacylglycerol, and ketone body metabolism	98	17 (17.3%)	0.00131	0.0228	Reactome
	Metabolism of proteins	687	75 (10.9%)	0.00133	0.0228	Reactome
	Protein export - Homo sapiens (human)	23	7 (30.4%)	0.00134	0.0228	KEGG
	Di-unsaturated fatty acid beta-oxidation	23	7 (30.4%)	0.00134	0.0228	EHMN
	Laminin interactions	23	7 (30.4%)	0.00134	0.0228	Reactome
	Syndecan-1-mediated signaling events	43	10 (23.3%)	0.00135	0.0229	PID
	lectin induced complement pathway	12	5 (41.7%)	0.00138	0.023	BioCarta
	folate transformations I	12	5 (41.7%)	0.00138	0.023	HumanCyc
	Platelet degranulation	82	15 (18.3%)	0.00142	0.0233	Reactome
	Phenytoin (Antiarrhythmic) Action Pathway	82	15 (18.3%)	0.00142	0.0233	SMPDB
	Morphine Action Pathway	44	10 (22.7%)	0.00163	0.0264	SMPDB
	Amoebiasis - Homo sapiens (human)	109	18 (16.5%)	0.00171	0.027	KEGG
	Fructose intolerance, hereditary	18	6 (33.3%)	0.00176	0.027	SMPDB
	Fructose and Mannose Degradation	18	6 (33.3%)	0.00176	0.027	SMPDB
	Fructosuria	18	6 (33.3%)	0.00176	0.027	SMPDB
	BMP Signalling Pathway	18	6 (33.3%)	0.00176	0.027	HumanCyc
	Amino acid synthesis and interconversion (transamination)	18	6 (33.3%)	0.00176	0.027	Reactome
	IL1 and megakaryotyces in obesity	24	7 (29.2%)	0.00176	0.027	Wikipathways
	Synthesis of substrates in N-glycan biosythesis	52	11 (21.2%)	0.00181	0.0275	Reactome
	N-glycan trimming in the ER and Calnexin/Calreticulin cycle	13	5 (38.5%)	0.0021	0.0315	Reactome
	stearate biosynthesis	13	5 (38.5%)	0.0021	0.0315	HumanCyc
	Disulfiram Action Pathway	25	7 (28.0%)	0.00229	0.034	SMPDB
	Scavenging by Class A Receptors	19	6 (31.6%)	0.00241	0.0353	Reactome
	Tryptophan Metabolism	19	6 (31.6%)	0.00241	0.0353	SMPDB
	Metapathway biotransformation	177	25 (14.1%)	0.00245	0.0357	Wikipathways
	Inflammatory Response Pathway	32	8 (25.0%)	0.00248	0.0359	Wikipathways
	Response to elevated platelet cytosolic Ca2+	87	15 (17.2%)	0.00262	0.0373	Reactome
	ECM-receptor interaction - Homo sapiens (human)	87	15 (17.2%)	0.00262	0.0373	KEGG
	Ectoderm Differentiation	141	21 (14.9%)	0.00278	0.039	Wikipathways
	Direct p53 effectors	141	21 (14.9%)	0.00278	0.039	PID
	Basigin interactions	27	7 (26.9%)	0.00292	0.0405	Reactome
	ID	26	7 (26.9%)	0.00292	0.0405	NetPath
	Glycine, serine and threonine metabolism - Homo sapiens (human)	40	9 (22.5%)	0.00297	0.0408	KEGG
	fibrinolysis pathway	14	5 (35.7%)	0.00307	0.0419	BioCarta
	Aminosugars metabolism	20	6 (30.0%)	0.00321	0.0433	INOH
	Urea cycle and metabolism of amino groups	20	6 (30.0%)	0.00321	0.0433	Wikipathways
	Bile secretion - Homo sapiens (human)	72	13 (18.1%)	0.00326	0.0435	KEGG
	miR-targeted genes in muscle cell - TarBase	394	46 (11.7%)	0.00327	0.0435	Wikipathways
	BMP receptor signaling	41	9 (22.0%)	0.00355	0.0468	PID
	alk in cardiac myocytes	27	7 (25.9%)	0.00368	0.0483	BioCarta
	Amino acid and oligopeptide SLC transporters	49	10 (20.4%)	0.0038	0.0495	Reactome
	Vitamin D Receptor Pathway	184	25 (13.7%)	0.00385	0.0499	Wikipathways
	Extracellular matrix organization	264	33 (12.5%)	0.004	0.0511	Reactome
	ATF6-alpha activates chaperone genes	5	3 (60.0%)	0.00412	0.0511	Wikipathways
	ketolysis	5	3 (60.0%)	0.00412	0.0511	HumanCyc
	Abacavir transmembrane transport	5	3 (60.0%)	0.00412	0.0511	Reactome
	retinoate biosynthesis II	5	3 (60.0%)	0.00412	0.0511	HumanCyc
	Synthesis of UDP-N-acetyl-glucosamine	5	3 (60.0%)	0.00412	0.0511	Reactome
	UDP-N-acetyl-D-glucosamine biosynthesis II	5	3 (60.0%)	0.00412	0.0511	HumanCyc
	Validated targets of C-MYC transcriptional repression	74	13 (17.6%)	0.00416	0.0512	PID
	Signaling by BMP	21	6 (28.6%)	0.00421	0.0512	Reactome
	Mono-unsaturated fatty acid beta-oxidation	21	6 (28.6%)	0.00421	0.0512	EHMN
	il12 and stat4 dependent signaling pathway in th1 development	15	5 (33.3%)	0.00431	0.0518	BioCarta
	Unfolded Protein Response (UPR)	15	5 (33.3%)	0.00431	0.0518	Reactome
	Integrin cell surface interactions	67	12 (18.2%)	0.00435	0.0519	Reactome
	Ibuprofen Action Pathway	50	10 (20.0%)	0.00443	0.0525	SMPDB
	Alanine, aspartate and glutamate metabolism - Homo sapiens (human)	35	8 (22.9%)	0.00452	0.0533	KEGG
	Omega-6 fatty acid metabolism	28	7 (25.0%)	0.00459	0.0538	EHMN
	Biosynthesis of the N-glycan precursor (dolichol lipid-linked oligosaccharide, LLO) and transfer to a nascent protein	67	12 (17.9%)	0.00493	0.0575	Reactome
	IRE1alpha activates chaperones	10	4 (40.0%)	0.00516	0.0594	Reactome
	Phenylalanine and tyrosine catabolism	10	4 (40.0%)	0.00516	0.0594	Reactome
	Doxorubicin Pathway, Pharmacokinetics	22	6 (27.3%)	0.00541	0.0618	PharmGKB
	Pentose and glucuronate interconversions - Homo sapiens (human)	36	8 (22.2%)	0.00542	0.0618	KEGG
	p53 signaling pathway - Homo sapiens (human)	68	12 (17.6%)	0.00558	0.0632	KEGG
	Adipogenesis	131	19 (14.5%)	0.00578	0.0651	Wikipathways
	Deregulation of Rab and Rab Effector Genes in Bladder Cancer	16	5 (31.2%)	0.00587	0.0658	Wikipathways
	Metabolism of lipids and lipoproteins	517	56 (10.9%)	0.00612	0.0682	Reactome
	Glycine, serine, alanine and threonine metabolism	78	13 (16.7%)	0.00659	0.073	EHMN
	SLC-mediated transmembrane transport	263	32 (12.2%)	0.00678	0.0743	Reactome
	a6b1 and a6b4 Integrin signaling	45	9 (20.0%)	0.00679	0.0743	PID
	Butanoate metabolism	23	6 (26.1%)	0.00685	0.0743	EHMN
	Biosynthesis of unsaturated fatty acids - Homo sapiens (human)	23	6 (26.1%)	0.00685	0.0743	KEGG
	Oxidative Stress	30	7 (23.3%)	0.00689	0.0743	Wikipathways
	AP-1 transcription factor network	70	12 (17.1%)	0.00707	0.0758	PID
	Tyrosine metabolism	106	16 (15.1%)	0.00739	0.0788	EHMN
	Ubiquinone and other terpenoid-quinone biosynthesis - Homo sapiens (human)	11	4 (36.4%)	0.00761	0.0793	KEGG
	3-oxo-10R-octadecatrienoate beta-oxidation	11	4 (36.4%)	0.00761	0.0793	EHMN
	Calnexin/calreticulin cycle	11	4 (36.4%)	0.00761	0.0793	Reactome
	mRNA decay by 3, to 5, exoribonuclease	11	4 (36.4%)	0.00761	0.0793	Reactome
	tRNA charging	38	8 (21.1%)	0.00764	0.0793	HumanCyc
	ER Quality Control Compartment (ERQC)	6	3 (50.0%)	0.00777	0.0801	Reactome
	Doxorubicin Metabolism Pathway	17	5 (29.4%)	0.0078	0.0801	SMPDB
	Rheumatoid arthritis - Homo sapiens (human)	89	14 (15.7%)	0.00825	0.0844	KEGG
	TGF Beta Signaling Pathway	55	10 (18.2%)	0.00888	0.0903	Wikipathways
	IL6-mediated signaling events	47	9 (19.1%)	0.00909	0.092	PID
	Parkin-Ubiquitin Proteasomal System pathway	73	12 (16.4%)	0.00988	0.0995	Wikipathways
