# Supplementary material
Source: publisher figshare collection journal article supplement (https://acs.figshare.com/ndownloader/files/6979565)
Supplement: Supplementary file 2 [file 6979565 › Table S4.xlsx]

## Sheet: Sheet1
	Enriched pathway-based sets: 954 genes (63.2%) from the input list are present in at least one pathway.
	pathway name	set size	candidates contained	p-value	q-value	pathway source
	Protein processing in endoplasmic reticulum - Homo sapiens (human)	169	49 (29.2%)	4.67e-15	1.03e-11	KEGG
	Complement and coagulation cascades - Homo sapiens (human)	69	24 (34.8%)	8.98e-10	9.85e-07	KEGG
	Asparagine N-linked glycosylation	118	31 (26.3%)	8.49e-09	6.21e-06	Reactome
	Complement and Coagulation Cascades	60	20 (33.3%)	5.19e-08	2.85e-05	Wikipathways
	Formation of Fibrin Clot (Clotting Cascade)	39	15 (38.5%)	2.9e-07	0.000127	Reactome
	intrinsic prothrombin activation pathway	23	11 (47.8%)	8.42e-07	0.000231	BioCarta
	Irinotecan Action Pathway	23	11 (47.8%)	8.42e-07	0.000231	SMPDB
	Irinotecan Metabolism Pathway	23	11 (47.8%)	8.42e-07	0.000231	SMPDB
	ATF4 activates genes	7	6 (85.7%)	2.45e-06	0.000597	Wikipathways
	Acetaminophen Metabolism Pathway	31	12 (40.0%)	2.79e-06	0.000611	SMPDB
	Metabolism	1481	173 (11.7%)	3.21e-06	0.000641	Reactome
	Human Complement System	90	22 (24.4%)	4.51e-06	0.000647	Wikipathways
	3-Phosphoglycerate dehydrogenase deficiency	27	11 (40.7%)	5.9e-06	0.000647	SMPDB
	Non Ketotic Hyperglycinemia	27	11 (40.7%)	5.9e-06	0.000647	SMPDB
	Glycine and Serine Metabolism	27	11 (40.7%)	5.9e-06	0.000647	SMPDB
	Dimethylglycine Dehydrogenase Deficiency	27	11 (40.7%)	5.9e-06	0.000647	SMPDB
	Hyperglycinemia, non-ketotic	27	11 (40.7%)	5.9e-06	0.000647	SMPDB
	Dimethylglycine Dehydrogenase Deficiency	27	11 (40.7%)	5.9e-06	0.000647	SMPDB
	Sarcosinemia	27	11 (40.7%)	5.9e-06	0.000647	SMPDB
	Dihydropyrimidine Dehydrogenase Deficiency (DHPD)	27	11 (40.7%)	5.9e-06	0.000647	SMPDB
	Protein export - Homo sapiens (human)	23	10 (43.5%)	7.86e-06	0.000822	KEGG
	Etoposide Action Pathway	19	9 (47.4%)	9.61e-06	0.000917	SMPDB
	Etoposide Metabolism Pathway	19	9 (47.4%)	9.61e-06	0.000917	SMPDB
	Sorafenib Metabolism Pathway	15	8 (53.3%)	1.01e-05	0.000922	SMPDB
	Aminosugars metabolism	20	9 (45.0%)	1.62e-05	0.00142	INOH
	Morphine Metabolism Pathway	16	8 (50.0%)	1.87e-05	0.00158	SMPDB
	Metabolism of amino acids and derivatives	150	29 (19.3%)	2.19e-05	0.00176	Reactome
	Nuclear Receptors Meta-Pathway	314	49 (15.6%)	2.25e-05	0.00176	Wikipathways
	Beta1 integrin cell surface interactions	66	17 (25.8%)	2.61e-05	0.00197	PID
	Regulation of lipid metabolism by Peroxisome proliferator-activated receptor alpha (PPARalpha)	42	13 (31.0%)	2.83e-05	0.00207	Wikipathways
	Common Pathway of Fibrin Clot Formation	22	9 (40.9%)	4.09e-05	0.0029	Reactome
	Glutamate Glutamine metabolism	27	10 (37.0%)	4.23e-05	0.0029	INOH
	Post-translational protein modification	350	52 (14.9%)	4.97e-05	0.0033	Reactome
	Vitamin D Receptor Pathway	184	32 (17.5%)	6.74e-05	0.00435	Wikipathways
	Synthesis of substrates in N-glycan biosythesis	52	14 (26.9%)	7.89e-05	0.00494	Reactome
	Metabolism of proteins	687	87 (12.7%)	8.82e-05	0.00538	Reactome
	Regulation of Complement cascade	24	9 (37.5%)	9.2e-05	0.00545	Reactome
	Unfolded Protein Response (UPR)	15	7 (46.7%)	0.000111	0.00643	Reactome
	Fructose Mannose metabolism	30	10 (33.3%)	0.000119	0.00658	INOH
	Biosynthesis of the N-glycan precursor (dolichol lipid-linked oligosaccharide, LLO) and transfer to a nascent protein	67	16 (23.9%)	0.00012	0.00658	Reactome
	Amino sugar and nucleotide sugar metabolism - Homo sapiens (human)	48	13 (27.1%)	0.000132	0.00708	KEGG
	Beta3 integrin cell surface interactions	43	12 (27.9%)	0.000175	0.00872	PID
	Vitamin A Deficiency	37	11 (29.7%)	0.000175	0.00872	SMPDB
	Retinol Metabolism	37	11 (29.7%)	0.000175	0.00872	SMPDB
	Ardeparin Action Pathway	21	8 (38.1%)	0.000201	0.00917	SMPDB
	Heparin Action Pathway	21	8 (38.1%)	0.000201	0.00917	SMPDB
	Fondaparinux Action Pathway	21	8 (38.1%)	0.000201	0.00917	SMPDB
	Enoxaparin Action Pathway	21	8 (38.1%)	0.000201	0.00917	SMPDB
	Synthesis of GDP-mannose	5	4 (80.0%)	0.000244	0.0108	Reactome
	Glucocorticoid Receptor Pathway	71	16 (22.5%)	0.000247	0.0108	Wikipathways
	Sialuria or French Type Sialuria	17	7 (41.2%)	0.000289	0.0113	SMPDB
	Sialuria or French Type Sialuria	17	7 (41.2%)	0.000289	0.0113	SMPDB
	Amino Sugar Metabolism	17	7 (41.2%)	0.000289	0.0113	SMPDB
	G(M2)-Gangliosidosis: Variant B, Tay-sachs disease	17	7 (41.2%)	0.000289	0.0113	SMPDB
	Tay-Sachs Disease	17	7 (41.2%)	0.000289	0.0113	SMPDB
	Salla Disease/Infantile Sialic Acid Storage Disease	17	7 (41.2%)	0.000289	0.0113	SMPDB
	HIF-1-alpha transcription factor network	66	15 (22.7%)	0.000347	0.0134	PID
	extrinsic prothrombin activation pathway	13	6 (46.2%)	0.000383	0.0145	BioCarta
	Ibuprofen Metabolism Pathway	23	8 (34.8%)	0.000414	0.0146	SMPDB
	Carnosinuria, carnosinemia	9	5 (55.6%)	0.000419	0.0146	SMPDB
	Ureidopropionase deficiency	9	5 (55.6%)	0.000419	0.0146	SMPDB
	GABA-Transaminase Deficiency	9	5 (55.6%)	0.000419	0.0146	SMPDB
	Beta-Alanine Metabolism	9	5 (55.6%)	0.000419	0.0146	SMPDB
	Rheumatoid arthritis - Homo sapiens (human)	89	18 (20.2%)	0.000434	0.0149	KEGG
	miR-targeted genes in squamous cell - TarBase	154	26 (16.9%)	0.000552	0.0186	Wikipathways
	Arginine Proline metabolism	55	13 (23.6%)	0.000568	0.0188	INOH
	Cytosolic tRNA aminoacylation	24	8 (33.3%)	0.000576	0.0188	Reactome
	GDP-mannose biosynthesis	6	4 (66.7%)	0.000683	0.0217	HumanCyc
	IRE1alpha activates chaperones	10	5 (50.0%)	0.000778	0.0217	Reactome
	Disulfiram Action Pathway	25	8 (32.0%)	0.000784	0.0217	SMPDB
	Alanine Aspartate Asparagine metabolism	25	8 (32.0%)	0.000784	0.0217	INOH
	Trans-sulfuration and one carbon metabolism	31	9 (29.0%)	0.000823	0.0217	Wikipathways
	Metabolism of lipids and lipoproteins	517	65 (12.6%)	0.000825	0.0217	Reactome
	Bivalirudin Action Pathway	20	7 (35.0%)	0.000918	0.0217	SMPDB
	Argatroban Action Pathway	20	7 (35.0%)	0.000918	0.0217	SMPDB
	Ximelagatran Action Pathway	20	7 (35.0%)	0.000918	0.0217	SMPDB
	Lepirudin Action Pathway	20	7 (35.0%)	0.000918	0.0217	SMPDB
	Coagulation	20	7 (35.0%)	0.000918	0.0217	SMPDB
	Aminocaproic Acid Action Pathway	20	7 (35.0%)	0.000918	0.0217	SMPDB
	Tranexamic Acid Action Pathway	20	7 (35.0%)	0.000918	0.0217	SMPDB
	Urokinase Action Pathway	20	7 (35.0%)	0.000918	0.0217	SMPDB
	Reteplase Action Pathway	20	7 (35.0%)	0.000918	0.0217	SMPDB
	Streptokinase Action Pathway	20	7 (35.0%)	0.000918	0.0217	SMPDB
	Tenecteplase Action Pathway	20	7 (35.0%)	0.000918	0.0217	SMPDB
	Alteplase Action Pathway	20	7 (35.0%)	0.000918	0.0217	SMPDB
	Anistreplase Action Pathway	20	7 (35.0%)	0.000918	0.0217	SMPDB
	Aprotinin Action Pathway	20	7 (35.0%)	0.000918	0.0217	SMPDB
	Phenindione Action Pathway	20	7 (35.0%)	0.000918	0.0217	SMPDB
	Dicoumarol Action Pathway	20	7 (35.0%)	0.000918	0.0217	SMPDB
	Warfarin Action Pathway	20	7 (35.0%)	0.000918	0.0217	SMPDB
	Acenocoumarol Action Pathway	20	7 (35.0%)	0.000918	0.0217	SMPDB
	Phenprocoumon Action Pathway	20	7 (35.0%)	0.000918	0.0217	SMPDB
	Dicumarol Action Pathway	20	7 (35.0%)	0.000918	0.0217	SMPDB
	TGF-beta signaling pathway - Homo sapiens (human)	80	16 (20.0%)	0.00101	0.0235	KEGG
	Fructose and mannose metabolism - Homo sapiens (human)	32	9 (28.1%)	0.00106	0.0245	KEGG
	Butanoate metabolism - Homo sapiens (human)	27	8 (29.6%)	0.00138	0.0312	KEGG
	alk in cardiac myocytes	27	8 (29.6%)	0.00138	0.0312	BioCarta
	Ethanol Degradation	7	4 (57.1%)	0.00149	0.0326	SMPDB
	Synthesis, secretion, and inactivation of Glucagon-like Peptide-1 (GLP-1)	7	4 (57.1%)	0.00149	0.0326	Reactome
	serine and glycine biosynthesis	7	4 (57.1%)	0.00149	0.0326	HumanCyc
	Vibrio cholerae infection - Homo sapiens (human)	54	12 (22.2%)	0.00163	0.0355	KEGG
	Intrinsic Pathway of Fibrin Clot Formation	22	7 (31.8%)	0.00174	0.0363	Reactome
	Doxorubicin Pathway, Pharmacokinetics	22	7 (31.8%)	0.00174	0.0363	PharmGKB
	Blood Clotting Cascade	22	7 (31.8%)	0.00174	0.0363	Wikipathways
	Fatty Acid Biosynthesis	22	7 (31.8%)	0.00174	0.0363	Wikipathways
	Direct p53 effectors	141	23 (16.3%)	0.0018	0.0373	PID
	Glycine Serine metabolism	41	10 (24.4%)	0.00187	0.0384	INOH
	Complement Activation, Classical Pathway	17	6 (35.3%)	0.00205	0.0406	Wikipathways
	Doxorubicin Metabolism Pathway	17	6 (35.3%)	0.00205	0.0406	SMPDB
	Chylomicron-mediated lipid transport	17	6 (35.3%)	0.00205	0.0406	Reactome
	Drug Induction of Bile Acid Pathway	17	6 (35.3%)	0.00205	0.0406	Wikipathways
	Alanine, aspartate and glutamate metabolism - Homo sapiens (human)	35	9 (25.7%)	0.00211	0.0414	KEGG
	Glycine, serine, alanine and threonine metabolism	78	15 (19.2%)	0.00216	0.0418	EHMN
	Endochondral Ossification	64	13 (20.6%)	0.00217	0.0418	Wikipathways
	Non-integrin membrane-ECM interactions	42	10 (23.8%)	0.00228	0.0434	Reactome
	Amino acid conjugation of benzoic acid	4	3 (75.0%)	0.00231	0.0434	Wikipathways
	Arginine and proline metabolism - Homo sapiens (human)	50	11 (22.4%)	0.00231	0.0434	KEGG
	Phase 1 - Functionalization of compounds	79	15 (19.0%)	0.00246	0.0457	Reactome
	Bile secretion - Homo sapiens (human)	72	14 (19.4%)	0.00269	0.0491	KEGG
	Ibuprofen Action Pathway	50	11 (22.0%)	0.00274	0.0491	SMPDB
	Transport of gamma-carboxylated protein precursors from the endoplasmic reticulum to the Golgi apparatus	8	4 (50.0%)	0.00277	0.0491	Reactome
	inhibition of matrix metalloproteinases	8	4 (50.0%)	0.00277	0.0491	BioCarta
	XBP1(S) activates chaperone genes	8	4 (50.0%)	0.00277	0.0491	Reactome
	Synthesis, secretion, and inactivation of Glucose-dependent Insulinotropic Polypeptide (GIP)	8	4 (50.0%)	0.00277	0.0491	Reactome
	Fructose intolerance, hereditary	18	6 (33.3%)	0.00286	0.0494	SMPDB
	Fructose and Mannose Degradation	18	6 (33.3%)	0.00286	0.0494	SMPDB
	Fructosuria	18	6 (33.3%)	0.00286	0.0494	SMPDB
	Biological oxidations	185	27 (14.9%)	0.0029	0.0497	Reactome
	MHC class II antigen presentation	59	12 (20.7%)	0.0031	0.0527	Reactome
	Taxane Pathway, Pharmacokinetics	13	5 (38.5%)	0.0032	0.0536	PharmGKB
	N-glycan trimming in the ER and Calnexin/Calreticulin cycle	13	5 (38.5%)	0.0032	0.0536	Reactome
	Vitamin B12 Metabolism	51	11 (21.6%)	0.00324	0.0538	Wikipathways
	Morphine Action Pathway	44	10 (22.7%)	0.00328	0.0542	SMPDB
	Folate Metabolism	66	13 (19.7%)	0.00334	0.0547	Wikipathways
	Fatty acid, triacylglycerol, and ketone body metabolism	98	17 (17.3%)	0.00356	0.0575	Reactome
	Phenytoin (Antiarrhythmic) Action Pathway	82	15 (18.3%)	0.00357	0.0575	SMPDB
	Glycolysis	32	8 (25.8%)	0.00361	0.0575	Reactome
	beta-Alanine metabolism - Homo sapiens (human)	31	8 (25.8%)	0.00361	0.0575	KEGG
	Farnesoid X Receptor Pathway	19	6 (31.6%)	0.00388	0.0604	Wikipathways
	Tryptophan Metabolism	19	6 (31.6%)	0.00388	0.0604	SMPDB
	prion pathway	19	6 (31.6%)	0.00388	0.0604	BioCarta
	FOXA2 and FOXA3 transcription factor networks	45	10 (22.2%)	0.00391	0.0604	PID
	p53 signaling pathway - Homo sapiens (human)	68	13 (19.1%)	0.00438	0.0672	KEGG
	miR-targeted genes in muscle cell - TarBase	394	49 (12.4%)	0.00447	0.0681	Wikipathways
	classical complement pathway	14	5 (35.7%)	0.00463	0.0681	BioCarta
	Urea cycle	9	4 (44.4%)	0.00466	0.0681	Reactome
	Formation of annular gap junctions	9	4 (44.4%)	0.00466	0.0681	Reactome
	Gamma-carboxylation of protein precursors	9	4 (44.4%)	0.00466	0.0681	Reactome
	Removal of aminoterminal propeptides from gamma-carboxylated proteins	9	4 (44.4%)	0.00466	0.0681	Reactome
	Incretin synthesis, secretion, and inactivation	9	4 (44.4%)	0.00466	0.0681	Reactome
	ID	26	7 (26.9%)	0.00496	0.0681	NetPath
	Arginine biosynthesis - Homo sapiens (human)	20	6 (30.0%)	0.00515	0.0681	KEGG
	Urea cycle and metabolism of amino groups	20	6 (30.0%)	0.00515	0.0681	Wikipathways
	Hyperornithinemia with gyrate atrophy (HOGA)	20	6 (30.0%)	0.00515	0.0681	SMPDB
	Creatine deficiency, guanidinoacetate methyltransferase deficiency	20	6 (30.0%)	0.00515	0.0681	SMPDB
	L-arginine:glycine amidinotransferase deficiency	20	6 (30.0%)	0.00515	0.0681	SMPDB
	Hyperornithinemia-hyperammonemia-homocitrullinuria [HHH-syndrome]	20	6 (30.0%)	0.00515	0.0681	SMPDB
	Guanidinoacetate Methyltransferase Deficiency (GAMT Deficiency)	20	6 (30.0%)	0.00515	0.0681	SMPDB
	Prolinemia Type II	20	6 (30.0%)	0.00515	0.0681	SMPDB
	Prolidase Deficiency (PD)	20	6 (30.0%)	0.00515	0.0681	SMPDB
	Arginine and Proline Metabolism	20	6 (30.0%)	0.00515	0.0681	SMPDB
	Hyperprolinemia Type I	20	6 (30.0%)	0.00515	0.0681	SMPDB
	Hyperprolinemia Type II	20	6 (30.0%)	0.00515	0.0681	SMPDB
	Ornithine Aminotransferase Deficiency (OAT Deficiency)	20	6 (30.0%)	0.00515	0.0681	SMPDB
	Arginine: Glycine Amidinotransferase Deficiency (AGAT Deficiency)	20	6 (30.0%)	0.00515	0.0681	SMPDB
	Angiogenesis	20	6 (30.0%)	0.00515	0.0681	Wikipathways
	ATF6-alpha activates chaperone genes	5	3 (60.0%)	0.00541	0.069	Wikipathways
	ketolysis	5	3 (60.0%)	0.00541	0.069	HumanCyc
	Abacavir transmembrane transport	5	3 (60.0%)	0.00541	0.069	Reactome
	Synthesis of UDP-N-acetyl-glucosamine	5	3 (60.0%)	0.00541	0.069	Reactome
	UDP-N-acetyl-D-glucosamine biosynthesis II	5	3 (60.0%)	0.00541	0.069	HumanCyc
	tyrosine degradation	5	3 (60.0%)	0.00541	0.069	HumanCyc
	Pregnane X Receptor pathway	33	8 (24.2%)	0.00546	0.0693	Wikipathways
	Glycine, serine and threonine metabolism - Homo sapiens (human)	40	9 (22.5%)	0.00557	0.0702	KEGG
	TGF Beta Signaling Pathway	55	11 (20.0%)	0.00595	0.0745	Wikipathways
	Glucose metabolism	72	13 (18.3%)	0.0064	0.0797	Reactome
	Leukotriene metabolism	104	17 (16.3%)	0.00661	0.0819	EHMN
	Gap junction degradation	10	4 (40.0%)	0.00724	0.0879	Reactome
	Gamma-carboxylation, transport, and amino-terminal cleavage of proteins	10	4 (40.0%)	0.00724	0.0879	Reactome
	Synthesis and degradation of ketone bodies - Homo sapiens (human)	10	4 (40.0%)	0.00724	0.0879	KEGG
	Evolocumab Mechanism	2	2 (100.0%)	0.00725	0.0879	Wikipathways
	Metabolism of carbohydrates	261	34 (13.1%)	0.00737	0.0885	Reactome
	Amino acid and oligopeptide SLC transporters	49	10 (20.4%)	0.00738	0.0885	Reactome
	adp-ribosylation factor	28	7 (25.0%)	0.00769	0.0912	BioCarta
	Glyoxylate and dicarboxylate metabolism - Homo sapiens (human)	28	7 (25.0%)	0.00769	0.0912	KEGG
	Histidine metabolism	35	8 (22.9%)	0.00796	0.0939	EHMN
	Ectoderm Differentiation	141	21 (14.9%)	0.00818	0.0959	Wikipathways
	Metapathway biotransformation	177	25 (14.1%)	0.00822	0.0959	Wikipathways
	SLC-mediated transmembrane transport	263	34 (13.0%)	0.00875	0.101	Reactome
	Deregulation of Rab and Rab Effector Genes in Bladder Cancer	16	5 (31.2%)	0.00876	0.101	Wikipathways
	Lipid digestion, mobilization, and transport	58	11 (19.0%)	0.00896	0.103	Reactome
	Tryptophan degradation	66	12 (18.2%)	0.00912	0.103	INOH
	Glycolysis and Gluconeogenesis	67	12 (18.2%)	0.00912	0.103	EHMN
	Syndecan-1-mediated signaling events	43	9 (20.9%)	0.00913	0.103	PID
	Iron uptake and transport	43	9 (20.9%)	0.00913	0.103	Reactome
	Extracellular matrix organization	264	34 (12.9%)	0.00926	0.104	Reactome
	Pentose and glucuronate interconversions - Homo sapiens (human)	36	8 (22.2%)	0.00949	0.106	KEGG
