# Supplementary material
Source: publisher figshare collection journal article supplement (https://acs.figshare.com/ndownloader/files/6979565)
Supplement: Supplementary file 2 [file 6979565 › Table S5.xlsx]

## Sheet: Sheet1
	Enriched pathway-based sets: 508 genes (66.0%) from the input list are present in at least one pathway.
	pathway name	set size	candidates contained	p-value	q-value	pathway source
	Protein processing in endoplasmic reticulum - Homo sapiens (human)	169	31 (18.5%)	1.73e-11	2.43e-08	KEGG
	Complement and coagulation cascades - Homo sapiens (human)	69	18 (26.1%)	9.86e-10	6.92e-07	KEGG
	Complement and Coagulation Cascades	60	15 (25.0%)	4.66e-08	2.18e-05	Wikipathways
	Human Complement System	90	18 (20.0%)	8.93e-08	3.13e-05	Wikipathways
	intrinsic prothrombin activation pathway	23	9 (39.1%)	3.51e-07	9.85e-05	BioCarta
	Acetaminophen Metabolism Pathway	31	10 (33.3%)	4.48e-07	0.000105	SMPDB
	Formation of Fibrin Clot (Clotting Cascade)	39	11 (28.2%)	7.94e-07	0.000159	Reactome
	Morphine Metabolism Pathway	16	7 (43.8%)	3.04e-06	0.000482	SMPDB
	Common Pathway of Fibrin Clot Formation	22	8 (36.4%)	3.09e-06	0.000482	Reactome
	ATF4 activates genes	7	5 (71.4%)	3.67e-06	0.000515	Wikipathways
	Irinotecan Action Pathway	23	8 (34.8%)	4.56e-06	0.000533	SMPDB
	Irinotecan Metabolism Pathway	23	8 (34.8%)	4.56e-06	0.000533	SMPDB
	Regulation of Complement cascade	24	8 (33.3%)	6.57e-06	0.000709	Reactome
	Etoposide Action Pathway	19	7 (36.8%)	1.19e-05	0.00111	SMPDB
	Etoposide Metabolism Pathway	19	7 (36.8%)	1.19e-05	0.00111	SMPDB
	Sorafenib Metabolism Pathway	15	6 (40.0%)	2.99e-05	0.00262	SMPDB
	HIF-1-alpha transcription factor network	66	12 (18.2%)	3.5e-05	0.00273	PID
	Beta1 integrin cell surface interactions	66	12 (18.2%)	3.5e-05	0.00273	PID
	Protein export - Homo sapiens (human)	23	7 (30.4%)	4.94e-05	0.00364	KEGG
	Beta3 integrin cell surface interactions	43	9 (20.9%)	0.000108	0.00755	PID
	extrinsic prothrombin activation pathway	13	5 (38.5%)	0.000179	0.012	BioCarta
	Vitamin A Deficiency	37	8 (21.6%)	0.000205	0.0125	SMPDB
	Retinol Metabolism	37	8 (21.6%)	0.000205	0.0125	SMPDB
	Vitamin D Receptor Pathway	184	20 (10.9%)	0.000238	0.0135	Wikipathways
	TGF-beta signaling pathway - Homo sapiens (human)	80	12 (15.0%)	0.000241	0.0135	KEGG
	Platelet degranulation	82	12 (14.6%)	0.000305	0.0165	Reactome
	Doxorubicin Pathway, Pharmacokinetics	22	6 (27.3%)	0.000339	0.0176	PharmGKB
	Unfolded Protein Response (UPR)	15	5 (33.3%)	0.000388	0.0194	Reactome
	Ibuprofen Metabolism Pathway	23	6 (26.1%)	0.000442	0.0214	SMPDB
	Response to elevated platelet cytosolic Ca2+	87	12 (13.8%)	0.000532	0.0249	Reactome
	IL1 and megakaryotyces in obesity	24	6 (25.0%)	0.000566	0.0256	Wikipathways
	IRE1alpha activates chaperones	10	4 (40.0%)	0.000707	0.0289	Reactome
	Morphine Action Pathway	44	8 (18.2%)	0.000711	0.0289	SMPDB
	Integrin cell surface interactions	67	10 (15.2%)	0.000723	0.0289	Reactome
	Complement Activation, Classical Pathway	17	5 (29.4%)	0.000741	0.0289	Wikipathways
	Doxorubicin Metabolism Pathway	17	5 (29.4%)	0.000741	0.0289	SMPDB
	Alanine, aspartate and glutamate metabolism - Homo sapiens (human)	35	7 (20.0%)	0.000844	0.0291	KEGG
	Adipogenesis	131	15 (11.5%)	0.000861	0.0291	Wikipathways
	ATF6-alpha activates chaperone genes	5	3 (60.0%)	0.000867	0.0291	Wikipathways
	ketolysis	5	3 (60.0%)	0.000867	0.0291	HumanCyc
	Abacavir transmembrane transport	5	3 (60.0%)	0.000867	0.0291	Reactome
	Extracellular matrix organization	264	24 (9.1%)	0.000884	0.0291	Reactome
	Asparagine N-linked glycosylation	118	14 (11.9%)	0.000893	0.0291	Reactome
	Doxorubicin Pathway (Cancer Cell), Pharmacodynamics	18	5 (27.8%)	0.000988	0.0312	PharmGKB
	Metabolism of proteins	687	49 (7.1%)	0.001	0.0312	Reactome
	Nuclear Receptors Meta-Pathway	314	27 (8.6%)	0.00107	0.0325	Wikipathways
	Glutamate Glutamine metabolism	27	6 (22.2%)	0.00111	0.0325	INOH
	Metapathway biotransformation	177	18 (10.2%)	0.00113	0.0325	Wikipathways
	Phenytoin (Antiarrhythmic) Action Pathway	82	11 (13.4%)	0.00114	0.0325	SMPDB
	Bivalirudin Action Pathway	20	5 (25.0%)	0.00166	0.0332	SMPDB
	Argatroban Action Pathway	20	5 (25.0%)	0.00166	0.0332	SMPDB
	Ximelagatran Action Pathway	20	5 (25.0%)	0.00166	0.0332	SMPDB
	Lepirudin Action Pathway	20	5 (25.0%)	0.00166	0.0332	SMPDB
	Coagulation	20	5 (25.0%)	0.00166	0.0332	SMPDB
	Aminocaproic Acid Action Pathway	20	5 (25.0%)	0.00166	0.0332	SMPDB
	Tranexamic Acid Action Pathway	20	5 (25.0%)	0.00166	0.0332	SMPDB
	Urokinase Action Pathway	20	5 (25.0%)	0.00166	0.0332	SMPDB
	Reteplase Action Pathway	20	5 (25.0%)	0.00166	0.0332	SMPDB
	Streptokinase Action Pathway	20	5 (25.0%)	0.00166	0.0332	SMPDB
	Tenecteplase Action Pathway	20	5 (25.0%)	0.00166	0.0332	SMPDB
	Alteplase Action Pathway	20	5 (25.0%)	0.00166	0.0332	SMPDB
	Anistreplase Action Pathway	20	5 (25.0%)	0.00166	0.0332	SMPDB
	Aprotinin Action Pathway	20	5 (25.0%)	0.00166	0.0332	SMPDB
	Phenindione Action Pathway	20	5 (25.0%)	0.00166	0.0332	SMPDB
	Dicoumarol Action Pathway	20	5 (25.0%)	0.00166	0.0332	SMPDB
	Warfarin Action Pathway	20	5 (25.0%)	0.00166	0.0332	SMPDB
	Acenocoumarol Action Pathway	20	5 (25.0%)	0.00166	0.0332	SMPDB
	Phenprocoumon Action Pathway	20	5 (25.0%)	0.00166	0.0332	SMPDB
	Dicumarol Action Pathway	20	5 (25.0%)	0.00166	0.0332	SMPDB
	Angiogenesis	20	5 (25.0%)	0.00166	0.0332	Wikipathways
	Signaling pathways regulating pluripotency of stem cells - Homo sapiens (human)	142	15 (10.6%)	0.00196	0.0381	KEGG
	Fructose Mannose metabolism	30	6 (20.0%)	0.00198	0.0381	INOH
	Beta2 integrin cell surface interactions	30	6 (20.0%)	0.00198	0.0381	PID
	Ardeparin Action Pathway	21	5 (23.8%)	0.0021	0.0382	SMPDB
	Heparin Action Pathway	21	5 (23.8%)	0.0021	0.0382	SMPDB
	Fondaparinux Action Pathway	21	5 (23.8%)	0.0021	0.0382	SMPDB
	Enoxaparin Action Pathway	21	5 (23.8%)	0.0021	0.0382	SMPDB
	BMP receptor signaling	41	7 (17.1%)	0.00223	0.0401	PID
	Blood Clotting Cascade	22	5 (22.7%)	0.00261	0.0464	Wikipathways
	Terminal pathway of complement	7	3 (42.9%)	0.00283	0.0487	Reactome
	Synthesis, secretion, and inactivation of Glucagon-like Peptide-1 (GLP-1)	7	3 (42.9%)	0.00283	0.0487	Reactome
	classical complement pathway	14	4 (28.6%)	0.00291	0.0487	BioCarta
	bile acid biosynthesis, neutral pathway	14	4 (28.6%)	0.00291	0.0487	HumanCyc
	fibrinolysis pathway	14	4 (28.6%)	0.00291	0.0487	BioCarta
	Syndecan-1-mediated signaling events	43	7 (16.3%)	0.00296	0.0488	PID
	TGF Beta Signaling Pathway	55	8 (14.5%)	0.00316	0.0515	Wikipathways
	Pregnane X Receptor pathway	33	6 (18.2%)	0.0033	0.0532	Wikipathways
	Metabolism of amino acids and derivatives	150	15 (10.0%)	0.00333	0.0532	Reactome
	Cytosolic tRNA aminoacylation	24	5 (20.8%)	0.00391	0.0617	Reactome
	Complement cascade	84	10 (12.0%)	0.0042	0.0652	Reactome
	inhibition of matrix metalloproteinases	8	3 (37.5%)	0.00438	0.0652	BioCarta
	XBP1(S) activates chaperone genes	8	3 (37.5%)	0.00438	0.0652	Reactome
	Synthesis, secretion, and inactivation of Glucose-dependent Insulinotropic Polypeptide (GIP)	8	3 (37.5%)	0.00438	0.0652	Reactome
	Glucose-Alanine Cycle	8	3 (37.5%)	0.00438	0.0652	SMPDB
	Steroid hormone biosynthesis - Homo sapiens (human)	58	8 (13.8%)	0.00441	0.0652	KEGG
	NRF2 pathway	140	14 (10.0%)	0.0045	0.0657	Wikipathways
	Alanine Aspartate Asparagine metabolism	25	5 (20.0%)	0.00471	0.0681	INOH
	Triglyceride Biosynthesis	47	7 (14.9%)	0.00494	0.0707	Reactome
	Pentose and glucuronate interconversions - Homo sapiens (human)	36	6 (16.7%)	0.00517	0.0732	KEGG
	Basigin interactions	27	5 (19.2%)	0.00562	0.0788	Reactome
	glutamine degradation/glutamate biosynthesis	3	2 (66.7%)	0.00598	0.0799	HumanCyc
	Oxygen-dependent asparagine hydroxylation of Hypoxia-inducible Factor Alpha	3	2 (66.7%)	0.00598	0.0799	Reactome
	Utilization of Ketone Bodies	3	2 (66.7%)	0.00598	0.0799	Reactome
	Erlotinib Action Pathway	3	2 (66.7%)	0.00598	0.0799	SMPDB
	PERK regulates gene expression	3	2 (66.7%)	0.00598	0.0799	Reactome
	Incretin synthesis, secretion, and inactivation	9	3 (33.3%)	0.00635	0.081	Reactome
	3-Phosphoglycerate dehydrogenase deficiency	27	5 (18.5%)	0.00664	0.081	SMPDB
	Non Ketotic Hyperglycinemia	27	5 (18.5%)	0.00664	0.081	SMPDB
	Glycine and Serine Metabolism	27	5 (18.5%)	0.00664	0.081	SMPDB
	Dimethylglycine Dehydrogenase Deficiency	27	5 (18.5%)	0.00664	0.081	SMPDB
	Hyperglycinemia, non-ketotic	27	5 (18.5%)	0.00664	0.081	SMPDB
	Dimethylglycine Dehydrogenase Deficiency	27	5 (18.5%)	0.00664	0.081	SMPDB
	Sarcosinemia	27	5 (18.5%)	0.00664	0.081	SMPDB
	Dihydropyrimidine Dehydrogenase Deficiency (DHPD)	27	5 (18.5%)	0.00664	0.081	SMPDB
	alk in cardiac myocytes	27	5 (18.5%)	0.00664	0.081	BioCarta
	Rheumatoid arthritis - Homo sapiens (human)	89	10 (11.2%)	0.0069	0.0834	KEGG
	Ibuprofen Action Pathway	50	7 (14.0%)	0.00698	0.0837	SMPDB
	Metabolism	1481	86 (5.8%)	0.00753	0.0895	Reactome
	Amino acid synthesis and interconversion (transamination)	18	4 (22.2%)	0.00771	0.0902	Reactome
	BMP Signalling Pathway	18	4 (22.2%)	0.00771	0.0902	HumanCyc
	Glyoxylate and dicarboxylate metabolism - Homo sapiens (human)	28	5 (17.9%)	0.00779	0.0904	KEGG
	Synthesis of substrates in N-glycan biosythesis	52	7 (13.5%)	0.00865	0.0969	Reactome
	Binding and Uptake of Ligands by Scavenger Receptors	40	6 (15.0%)	0.00874	0.0969	Reactome
	alternative complement pathway	10	3 (30.0%)	0.00877	0.0969	BioCarta
	Growth hormone signaling	10	3 (30.0%)	0.00877	0.0969	INOH
	Abacavir transport and metabolism	10	3 (30.0%)	0.00877	0.0969	Reactome
	Synthesis and degradation of ketone bodies - Homo sapiens (human)	10	3 (30.0%)	0.00877	0.0969	KEGG
	Post-translational protein modification	350	26 (7.4%)	0.00924	0.101	Reactome
	Growth hormone receptor signaling	19	4 (21.1%)	0.00943	0.103	Reactome
	Folate Metabolism	66	8 (12.1%)	0.00966	0.104	Wikipathways
	Glycine Serine metabolism	41	6 (14.6%)	0.00986	0.106	INOH
