# Supplementary material
Source: publisher figshare collection journal article supplement (https://acs.figshare.com/ndownloader/files/6979565)
Supplement: Supplementary file 2 [file 6979565 › Table S6.xlsx]

## Sheet: Sheet1
	Enriched pathway-based sets: 265 genes (59.2%) from the input list are present in at least one pathway.
	pathway name	set size	candidates contained	p-value	q-value	pathway source
	Axon guidance	459	22 (4.8%)	0.00125	0.258	Reactome
	MFAP5-mediated ovarian cancer cell motility and invasiveness	12	3 (25.0%)	0.00246	0.258	Wikipathways
	Rho GTPase cycle	125	9 (7.3%)	0.00256	0.258	Reactome
	Ras signaling pathway - Homo sapiens (human)	228	13 (5.7%)	0.00292	0.258	KEGG
	Developmental Biology	586	25 (4.3%)	0.00299	0.258	Reactome
	VEGF signaling pathway - Homo sapiens (human)	61	6 (9.8%)	0.0031	0.258	KEGG
	Histamine receptors	4	2 (50.0%)	0.00325	0.258	Reactome
	Basal transcription factors - Homo sapiens (human)	45	5 (11.1%)	0.00403	0.258	KEGG
	Signalling by NGF	386	18 (4.7%)	0.00452	0.258	Reactome
	NGF-independant TRKA activation	5	2 (40.0%)	0.00532	0.258	Reactome
	SUMO is conjugated to E1 (UBA2:SAE1)	5	2 (40.0%)	0.00532	0.258	Reactome
	Amine-derived hormones	16	3 (18.8%)	0.00584	0.258	Reactome
	Activation of TRKA receptors	6	2 (33.3%)	0.00786	0.258	Reactome
	Vitamin H (biotin) metabolism	6	2 (33.3%)	0.00786	0.258	EHMN
	SUMO is transferred from E1 to E2 (UBE2I, UBC9)	6	2 (33.3%)	0.00786	0.258	Reactome
	basic mechanisms of sumoylation	6	2 (33.3%)	0.00786	0.258	BioCarta
	SUMO is proteolytically processed	6	2 (33.3%)	0.00786	0.258	Reactome
	Alpha Linolenic Acid and Linoleic Acid Metabolism	6	2 (33.3%)	0.00786	0.258	SMPDB
	EPHA-mediated growth cone collapse	34	4 (11.8%)	0.00814	0.258	Reactome
	Signaling mediated by p38-alpha and p38-beta	35	4 (11.4%)	0.00902	0.258	PID
	Potassium Channels	100	7 (7.0%)	0.0095	0.258	Reactome
	Inactivation of APC/C via direct inhibition of the APC/C complex	19	3 (15.8%)	0.0096	0.258	Reactome
	Inhibition of the proteolytic activity of APC/C required for the onset of anaphase by mitotic spindle checkpoint components	19	3 (15.8%)	0.0096	0.258	Reactome
	EPH-Ephrin signaling	77	6 (7.8%)	0.00969	0.258	Reactome
