# Supplementary material
Source: publisher figshare collection journal article supplement (https://acs.figshare.com/ndownloader/files/6979565)
Supplement: Supplementary file 2 [file 6979565 › Table S7.xlsx]

## Sheet: Sheet1
	A) Upregulated
	Gene ID	Gene Symbol	Species	Gene Name
	586	BCAT1	Homo sapiens	branched chain amino acid transaminase 1
	7097	TLR2	Homo sapiens	toll-like receptor 2
	10950	BTG3	Homo sapiens	BTG family member 3
	23643	LY96	Homo sapiens	lymphocyte antigen 96
	54676	GTPBP2	Homo sapiens	GTP binding protein 2
	55062	WIPI1	Homo sapiens	WD repeat domain, phosphoinositide interacting 1
	56271	BEX4	Homo sapiens	brain expressed, X-linked 4
	80896	NPL	Homo sapiens	N-acetylneuraminate pyruvate lyase
	116496	FAM129A	Homo sapiens	family with sequence similarity 129 member A
	154141	MBOAT1	Homo sapiens	membrane bound O-acyltransferase domain containing 1
	B) Downregulated
	Gene ID	Gene Symbol	Species	Gene Name
	183	AGT	Homo sapiens	angiotensinogen
	219	ALDH1B1	Homo sapiens	aldehyde dehydrogenase 1 family member B1
	847	CAT	Homo sapiens	catalase
	3400	ID4	Homo sapiens	inhibitor of DNA binding 4, HLH protein
	5104	SERPINA5	Homo sapiens	serpin family A member 5
	5444	PON1	Homo sapiens	paraoxonase 1
	6567	SLC16A2	Homo sapiens	solute carrier family 16 member 2
	7429	VIL1	Homo sapiens	villin 1
	23189	KANK1	Homo sapiens	KN motif and ankyrin repeat domains 1
	51179	HAO2	Homo sapiens	hydroxyacid oxidase 2
	55286	C4orf19	Homo sapiens	chromosome 4 open reading frame 19
	55532	SLC30A10	Homo sapiens	solute carrier family 30 member 10
	64577	ALDH8A1	Homo sapiens	aldehyde dehydrogenase 8 family member A1
	81494	CFHR5	Homo sapiens	complement factor H related 5
	84649	DGAT2	Homo sapiens	diacylglycerol O-acyltransferase 2
	112817	HOGA1	Homo sapiens	4-hydroxy-2-oxoglutarate aldolase 1
	148738	HFE2	Homo sapiens	hemochromatosis type 2 (juvenile)
	359845	FAM101B	Homo sapiens	family with sequence similarity 101 member B
	401081	FLJ22763	Homo sapiens	uncharacterized LOC401081
	C) 18 genes (69.2%) from the input list are present in at least one pathway.
	set size	candidates contained	pathway source	pathway name	p-value	q-value
	7	2 (28.6%)	SMPDB	Ethanol Degradation	5.1e-05	0.00168
	59	3 (5.1%)	KEGG	Glycerolipid metabolism - Homo sapiens (human)	0.000107	0.00177
	27	2 (8.3%)	HumanCyc	triacylglycerol biosynthesis	0.00066	0.00495
	25	2 (8.0%)	SMPDB	Disulfiram Action Pathway	0.000717	0.00495
	26	2 (7.7%)	PID	Endogenous TLR signaling	0.000776	0.00495
	28	2 (7.1%)	KEGG	Glyoxylate and dicarboxylate metabolism - Homo sapiens (human)	0.0009	0.00495
	32	2 (6.2%)	INOH	Valine Leucine Isoleucine degradation	0.00118	0.00555
	35	2 (5.7%)	BioCarta	toll-like receptor pathway	0.00141	0.00581
	40	2 (5.0%)	KEGG	Tryptophan metabolism - Homo sapiens (human)	0.00184	0.00673
	47	2 (4.3%)	KEGG	Valine, leucine and isoleucine degradation - Homo sapiens (human)	0.00253	0.00824
	49	2 (4.1%)	EHMN	Valine, leucine and isoleucine degradation	0.00275	0.00824
	66	2 (3.0%)	INOH	Tryptophan degradation	0.00493	0.0136
	83	2 (2.4%)	KEGG	Peroxisome - Homo sapiens (human)	0.00769	0.016
	86	2 (2.3%)	Reactome	MyD88:Mal cascade initiated on plasma membrane	0.00824	0.016
	86	2 (2.3%)	Reactome	Toll Like Receptor TLR1:TLR2 Cascade	0.00824	0.016
	86	2 (2.3%)	Reactome	Toll Like Receptor TLR6:TLR2 Cascade	0.00824	0.016
	86	2 (2.3%)	Reactome	Toll Like Receptor 2 (TLR2) Cascade	0.00824	0.016
	94	2 (2.1%)	Reactome	Glycerophospholipid biosynthesis	0.00978	0.0179
