# Supplementary material
Source: publisher figshare collection journal article supplement (https://acs.figshare.com/ndownloader/files/6979565)

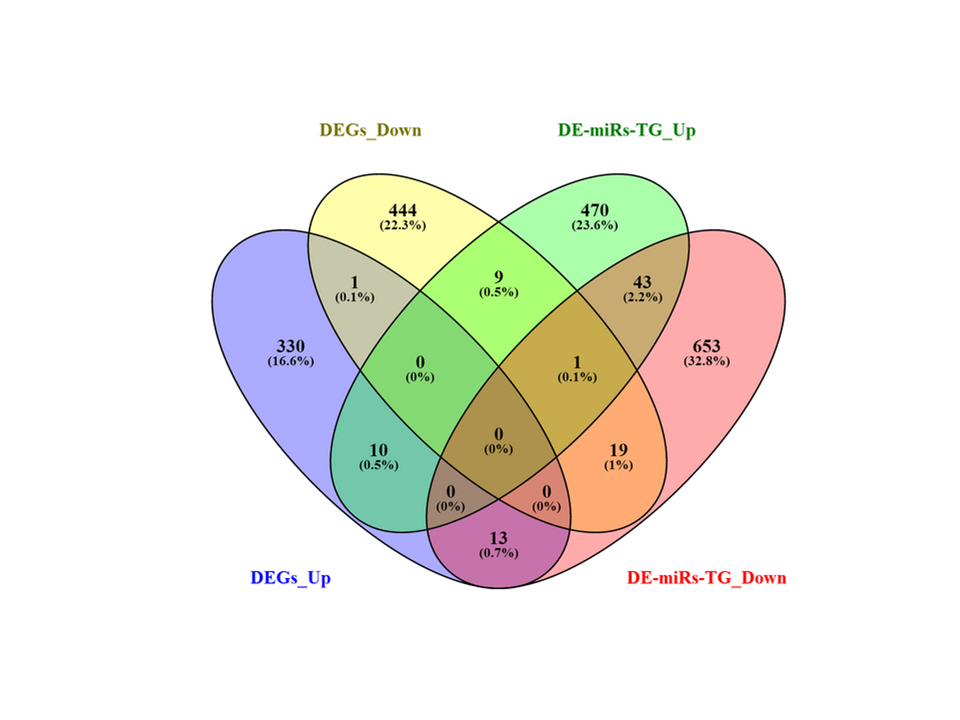

Supplement: Supplementary file 2 [file 6979565 › Figure S1.tif]
